# Supplementary material for: Unexpectedly rigid short peptide foldamers in which NH–π and CH–π interactions are preserved in solution
Source: Royal Society of Chemistry journal article supplement (doi:10.1039/d1cc02998c), 2021-01-01
Supplement: d1cc02998c1.pdf [file d1cc02998c1.pdf]

## Electronic Supplementary Information (ESI)

### Unexpectedly Rigid Short Peptide Foldamers in which NH- $\pi$ and CH- $\pi$ Interactions are Preserved in Solution

**Luhan Zhai<sup>1</sup>, Masayuki Nara<sup>2</sup>, Yuko Otani<sup>1</sup>, Tomohiko Ohwada<sup>\*,1</sup>**

<sup>1</sup> *Graduate School of Pharmaceutical Sciences, The University of Tokyo, 7-3-1 Hongo,  
Bunkyo-ku, Tokyo 113-0033, Japan*

<sup>2</sup> *Department of Chemistry, College of Liberal Arts and Sciences, Tokyo Medical and Dental  
University, Ichikawa, Chiba 272-0827, Japan*

*E-mail: ohwada@mol.f.u-tokyo.ac.jp*

## **Table of Contents**

|                                                                        |                |
|------------------------------------------------------------------------|----------------|
| <b>1. Supporting graphics and Tables</b>                               | <b>page 3</b>  |
| <b>2. 2D-NMR spectra</b>                                               | <b>page 16</b> |
| <b>3. Experimental Section of Synthesis</b>                            | <b>page 21</b> |
| <b>4. NMR measurements</b>                                             | <b>page 35</b> |
| <sup>1</sup> H and <sup>13</sup> C-NMR charts of synthesized compounds |                |
| <b>5. Circular Dichroism</b>                                           | <b>page 46</b> |
| <b>6. FTIR measurements</b>                                            | <b>Page 46</b> |
| <b>7. Calculations</b>                                                 | <b>Page 46</b> |
| <b>8. Reference</b>                                                    | <b>page 50</b> |

## 1.Supporting graphics and Tables

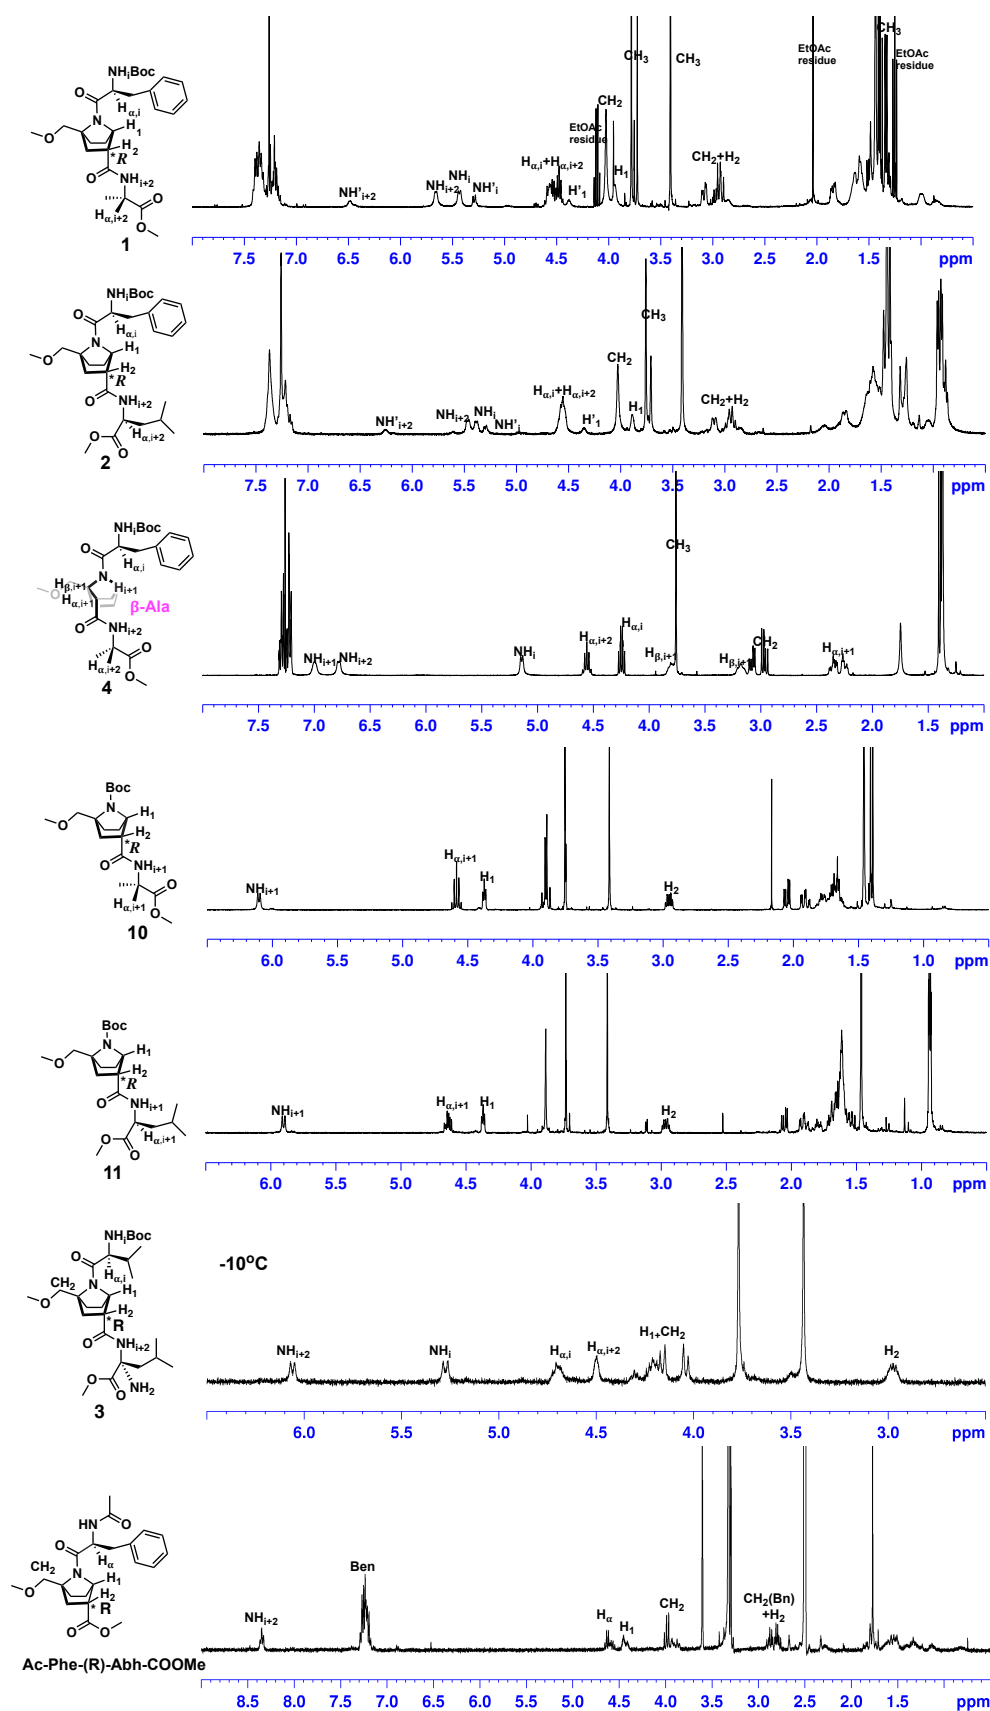

Figure S1,  $^1\text{H}$ -NMR of peptide 1, 2, 4, 10 and 11 in  $\text{CDCl}_3$  at  $25^\circ\text{C}$ , peptide 3 in

CDCl<sub>3</sub> at -10°C and dipeptide Ac-Phe-(R)-Abh-COOMe in DMSO at 25°C. Tripeptides **1** and **2** have two sets of peaks. Tripeptide **4**, dipeptides **10**, **11** and Ac-Phe-(R)-Abh-COOMe have a single set of peak.

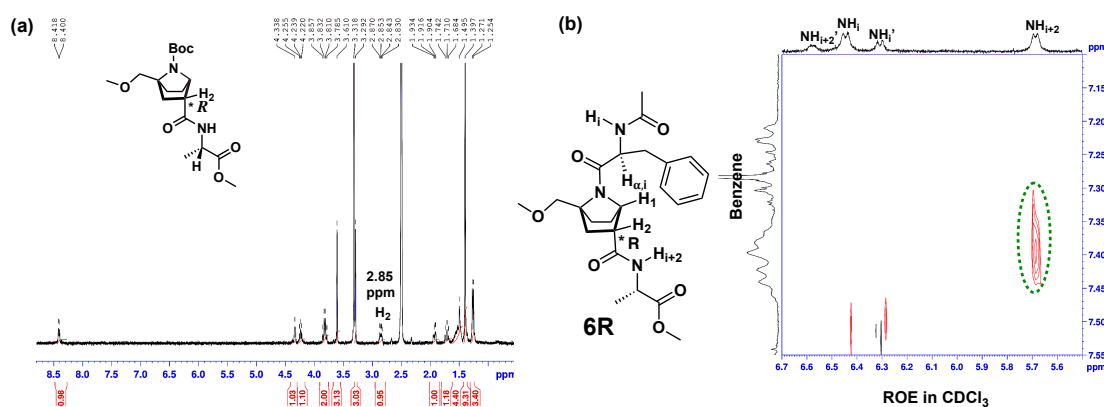

**Figure S2**, (a) <sup>1</sup>H-NMR of Boc-(*R*)-Abh-Ala-OMe **10** in DMSO at 25 °C.  
(b) Enlarged ROE of **6R** in CDCl<sub>3</sub>.

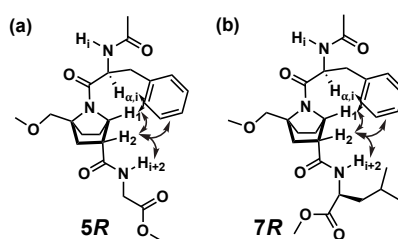

**Figure S3**. Key ROEs in the major component in DMSO. (a) Tripeptide **5R** (b) Tripeptide **7R**.

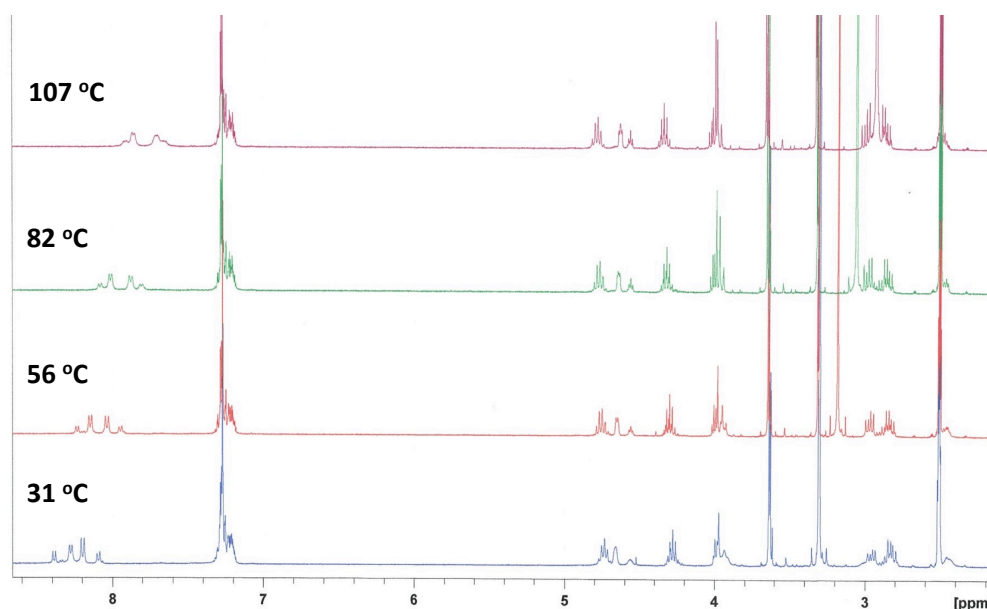

**Figure S4**, Variable-Temperature NMR of tripeptide **6R** in DMSO. The temperature is after calibration. As the temperature increases, the ratio of major to minor conformer didn't change obviously (around 2.3:1). Thus, the major and minor conformers are independent.



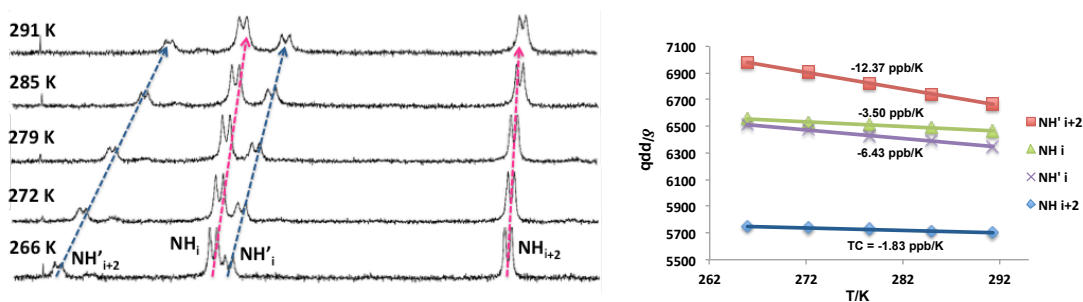

**Figure S5.** Temperature dependence of the NMR signals of **6R** in  $\text{CDCl}_3$ . Major component (folded form):  $\text{NH}_{i+2}$ : Ala-NH;  $\text{NH}_i$ : Phe-NH. Minor component (unfolded form):  $\text{NH}'_{i+2}$ : Ala-NH;  $\text{NH}'_i$ : Phe-NH.

**Table S1. Temperature Coefficient (ppb/K) of tripeptide 5R, 6R and 7R.**

| <b>5R</b>                 |                  |                  |                  |                  |
|---------------------------|------------------|------------------|------------------|------------------|
|                           | Phe-NH major     | Phe-NH minor     | Gly-NH major     | Gly-NH minor     |
| In $\text{CDCl}_3$        | -5.02            | -10.28           | <b>-4.09</b>     | -13.97           |
| In DMSO                   | -6.59            | -5.80            | <b>-4.14</b>     | -5.13            |
| In $\text{CD}_3\text{OH}$ | -8.81            | -8.23            | <b>-6.19</b>     | -5.77            |
| <b>6R</b>                 |                  |                  |                  |                  |
|                           | Phe-NH major     | Phe-NH minor     | Ala-NH major     | Ala-NH minor     |
| In $\text{CDCl}_3$        | -3.50            | -6.43            | <b>-1.83</b>     | -12.37           |
| In DMSO                   | -6.30            | -5.69            | <b>-5.22</b>     | -6.02            |
| In $\text{CD}_3\text{OH}$ | -8.56            | -8.16            | <b>-6.97</b>     | -5.81            |
| <b>7R</b>                 |                  |                  |                  |                  |
|                           | Phe-NH major     | Phe-NH minor     | Leu-NH major     | Leu-NH minor     |
| In $\text{CDCl}_3$        | -3.54            | -7.35            | <b>-1.20</b>     | -10.28           |
| In DMSO                   | -6.59            | -5.93            | <b>-5.36</b>     | -6.37            |
| In $\text{CD}_3\text{OH}$ | N/A <sup>a</sup> | N/A <sup>a</sup> | N/A <sup>a</sup> | N/A <sup>a</sup> |

<sup>a</sup> the separation of the peaks in  $\text{CD}_3\text{OH}$  is not good, so the data is not available.

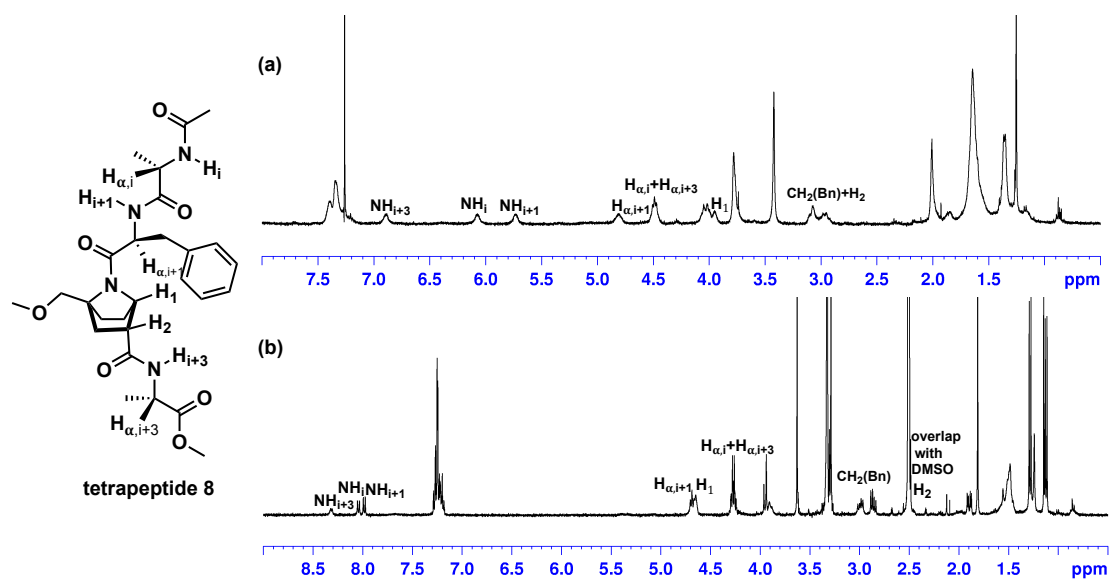

**Figure S6**, (a)  $^1\text{H}$ -NMR of tetrapeptide **8** in  $\text{CDCl}_3$  at 25°C. (b)  $^1\text{H}$ -NMR of tetrapeptide **8** in DMSO at 25°C. They all show one set of peak.

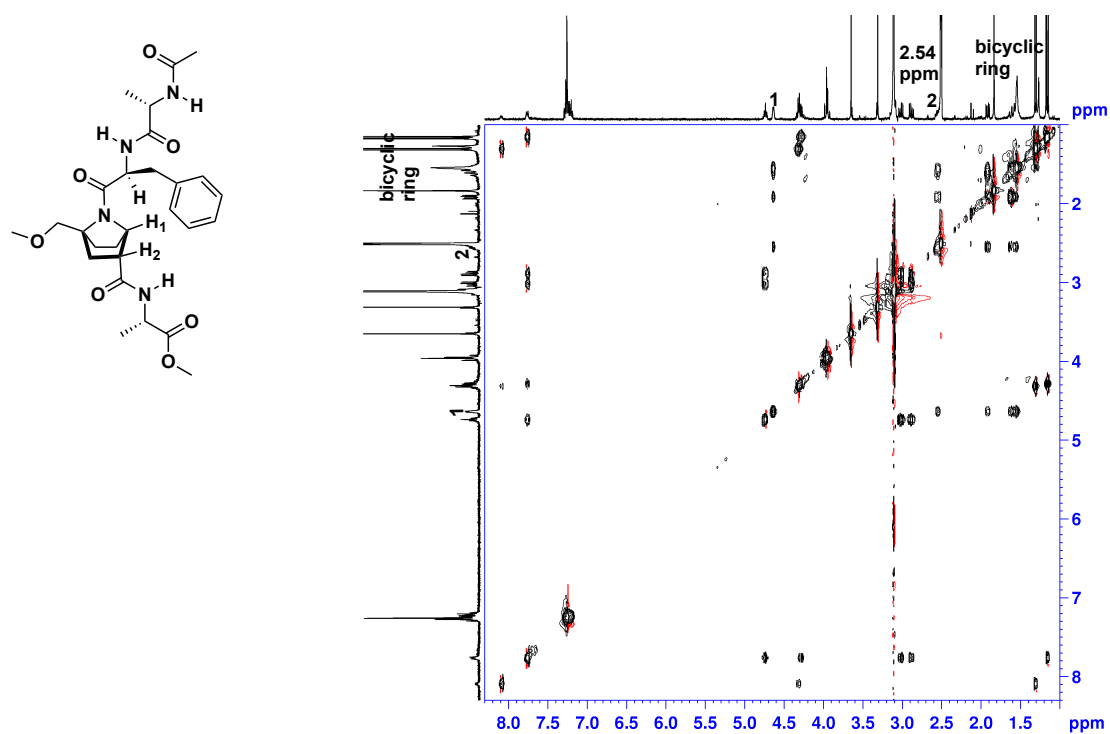

**Figure S7**, COSY of Ac-A-F-Abh-A-OMe **8** in DMSO at 60 °C.

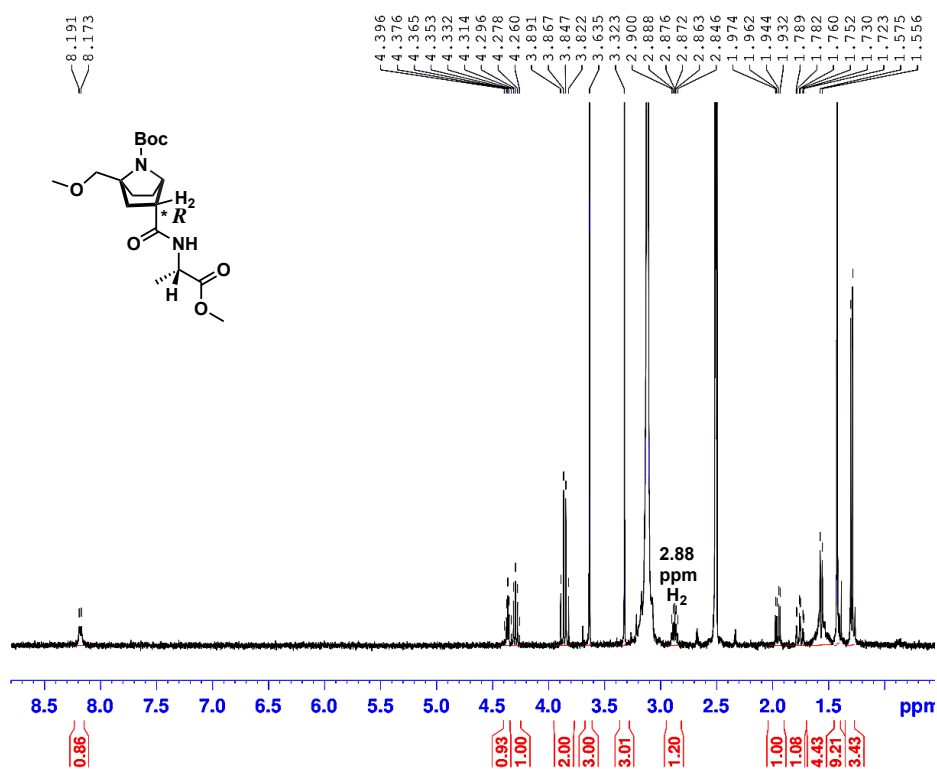

Figure S8, <sup>1</sup>H-NMR of Boc-(R)-Abh-Ala-OMe **10** in DMSO at 60 °C.

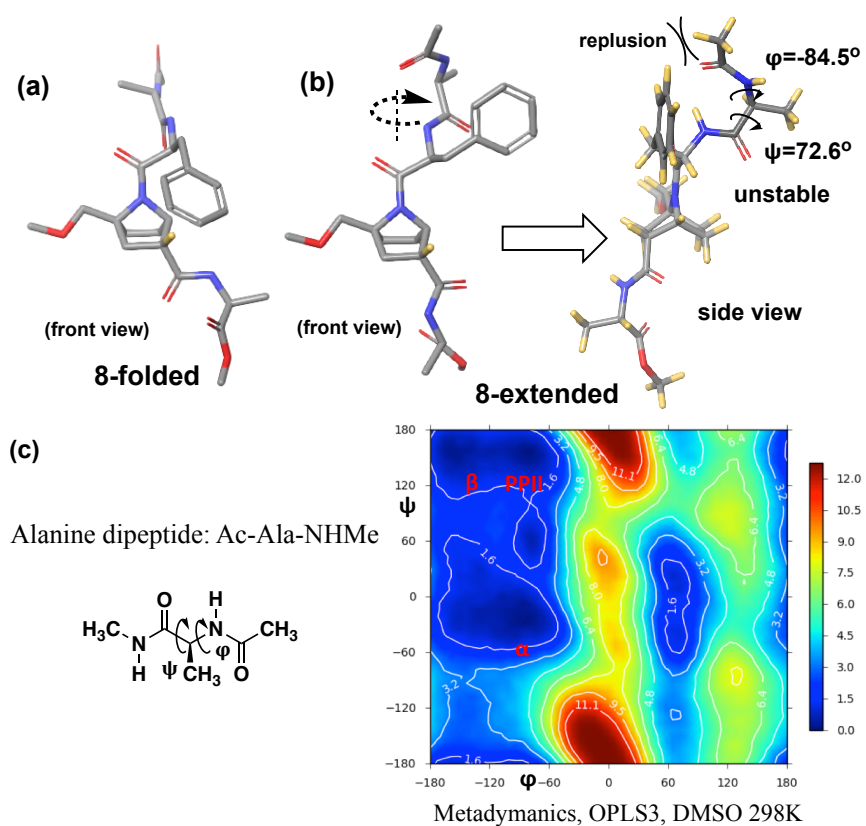

Figure S9, (a) Folded structure of **8**. (b) Front view and side view of the unfolded structure of **8**. Carbon atom, grey; oxygen, red; nitrogen, blue; hydrogen, orange. (c) energy-landscape of Ala dipeptide.

The stable folded structure (**8-folded**) and unstable unfolded structure (**8-extended**, though experimentally undetectable) of tetrapeptide **8** also can be obtained by MD calculations, followed by structure optimization by DFT calculations (M06-2X/6-31G(d), SMD = DMSO), and are shown in Figure S9a and 9b, respectively. One possible reason for the instability of the unfolded structure is that in the model alanine dipeptide (Ac-Ala-NHMe), there are three energetically favorable conformations in equilibrium, i.e.,  $\beta$ -strand (e.g. antiparallel,  $\phi = -139^\circ$ ,  $\psi = -135^\circ$ ; parallel,  $\phi = -119^\circ$ ,  $\psi = 113^\circ$ ), poly proline II helix (PPII) ( $-75^\circ$ ,  $145^\circ$ ) and  $\alpha$ -helix ( $-58^\circ$ ,  $-47^\circ$ ) (Figure S9c). We checked the  $\phi$  and  $\psi$  dihedral angles of the N-terminal Ac-Ala moiety of **8** of the unfolded structure (Figure S9b), and obtained  $\phi = -84.5^\circ$  and  $\psi = 72.6^\circ$  (Figure S9b). These values are outside the range of energetically favorable conformations, making the unfolded conformation less stable. The unfolded structure may also involve steric repulsion between the benzene ring and the acetyl group.

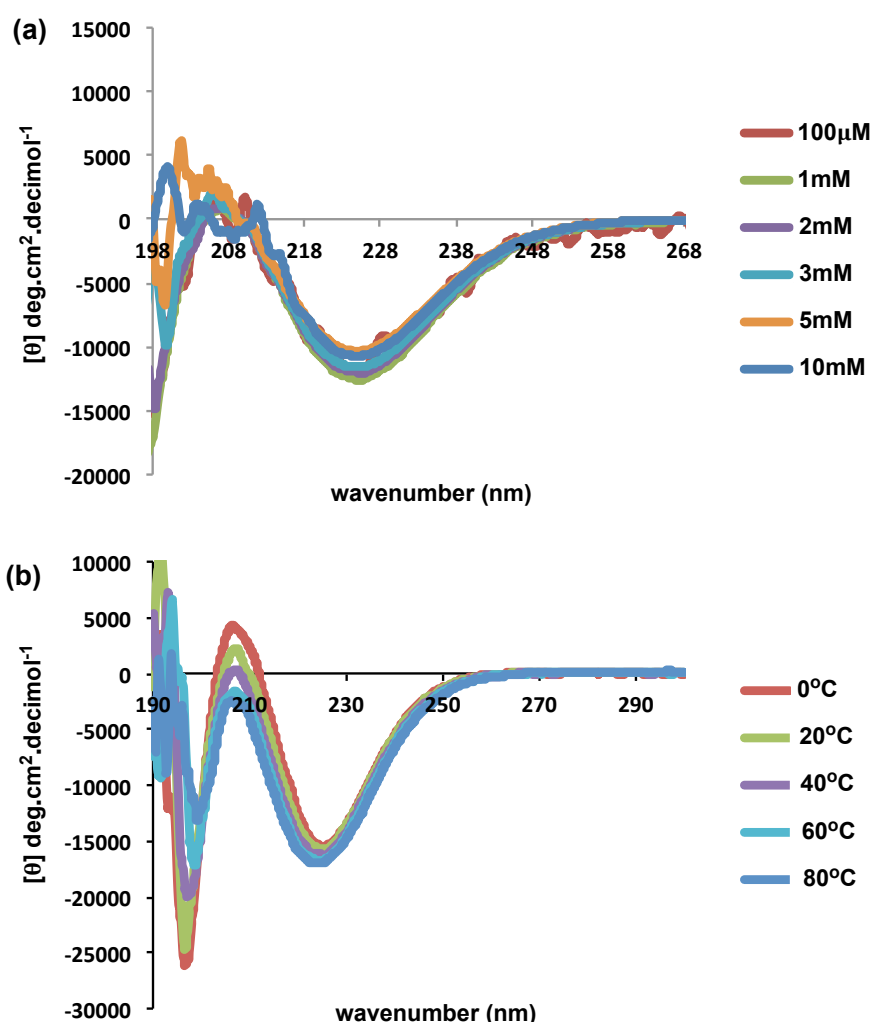

**Figure S10**, (a) CD spectra of concentration dependency of Ac-Ala-Phe-(*R*)-Abh-Ala-OMe **8** (100  $\mu$ M to 10mM) in MeOH at 20  $^\circ$ C. (b) CD spectra of temperature dependency of Ac-Ala-Phe-(*R*)-Abh-Ala-OMe **8** (1mM) in MeOH.

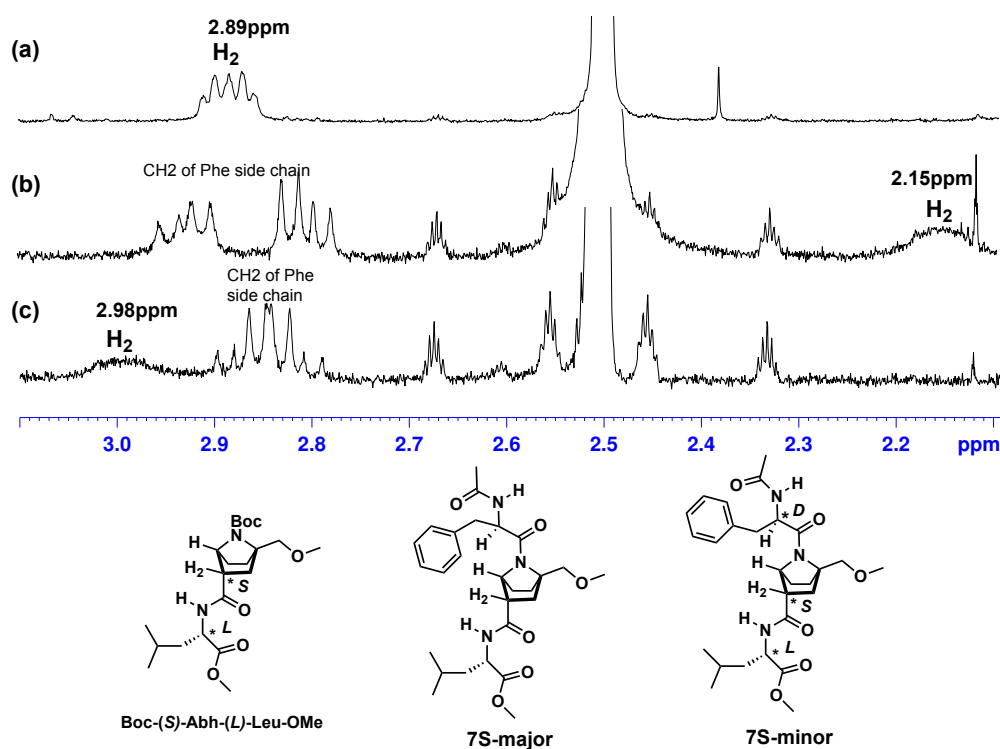

**Figure S11,** (a)  $^1\text{H}$ -NMR of Boc-(*S*)-Abh-(*L*)-Leu-OMe in DMSO at 25 °C. (b)  $^1\text{H}$ -NMR of 7S-major (Ac-(*D*)-Phe-(*S*)-Abh-(*L*)-Leu-OMe) in DMSO at 25 °C. (c)  $^1\text{H}$ -NMR of 7S-minor in DMSO at 25 °C.

Comparing with the  $\alpha$ -proton ( $\text{H}_2$ ) signal (2.89 ppm) of a reference dipeptide Boc-(*S*)-Abh-Leu-OMe, the  $\alpha$ -proton ( $\text{H}_2$ ) signal of the major conformer (7S-major) is shifted to 2.15 ppm in DMSO, suggesting the existence of  $\text{CH}\cdots\pi$  interaction, while the minor conformer (7S-minor) shows almost no shielding (at 2.98 ppm), suggesting the absence of  $\text{CH}\cdots\pi$  interaction. Therefore, 7S-major takes side chain folded conformation and 7S-minor takes unfolded extended conformation.

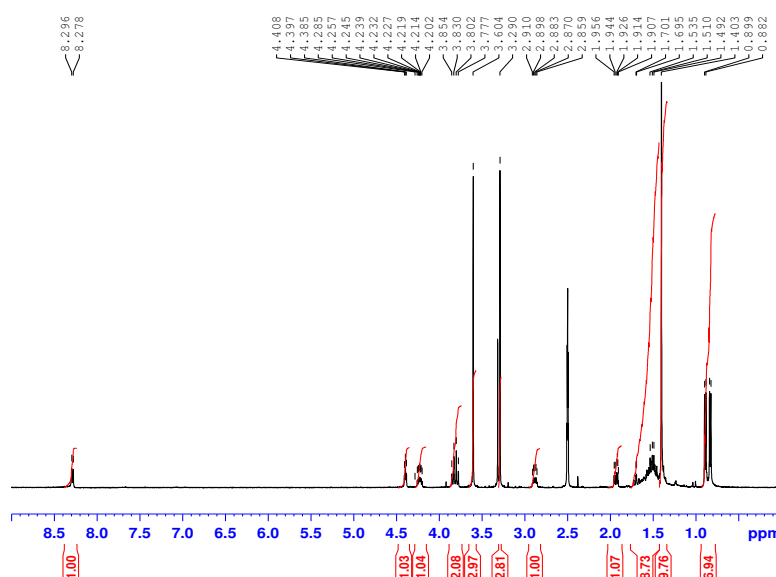

**Figure S12,**  $^1\text{H}$ -NMR of Boc-(*S*)-Abh-(*L*)-Leu-OMe in DMSO at 25 °C.

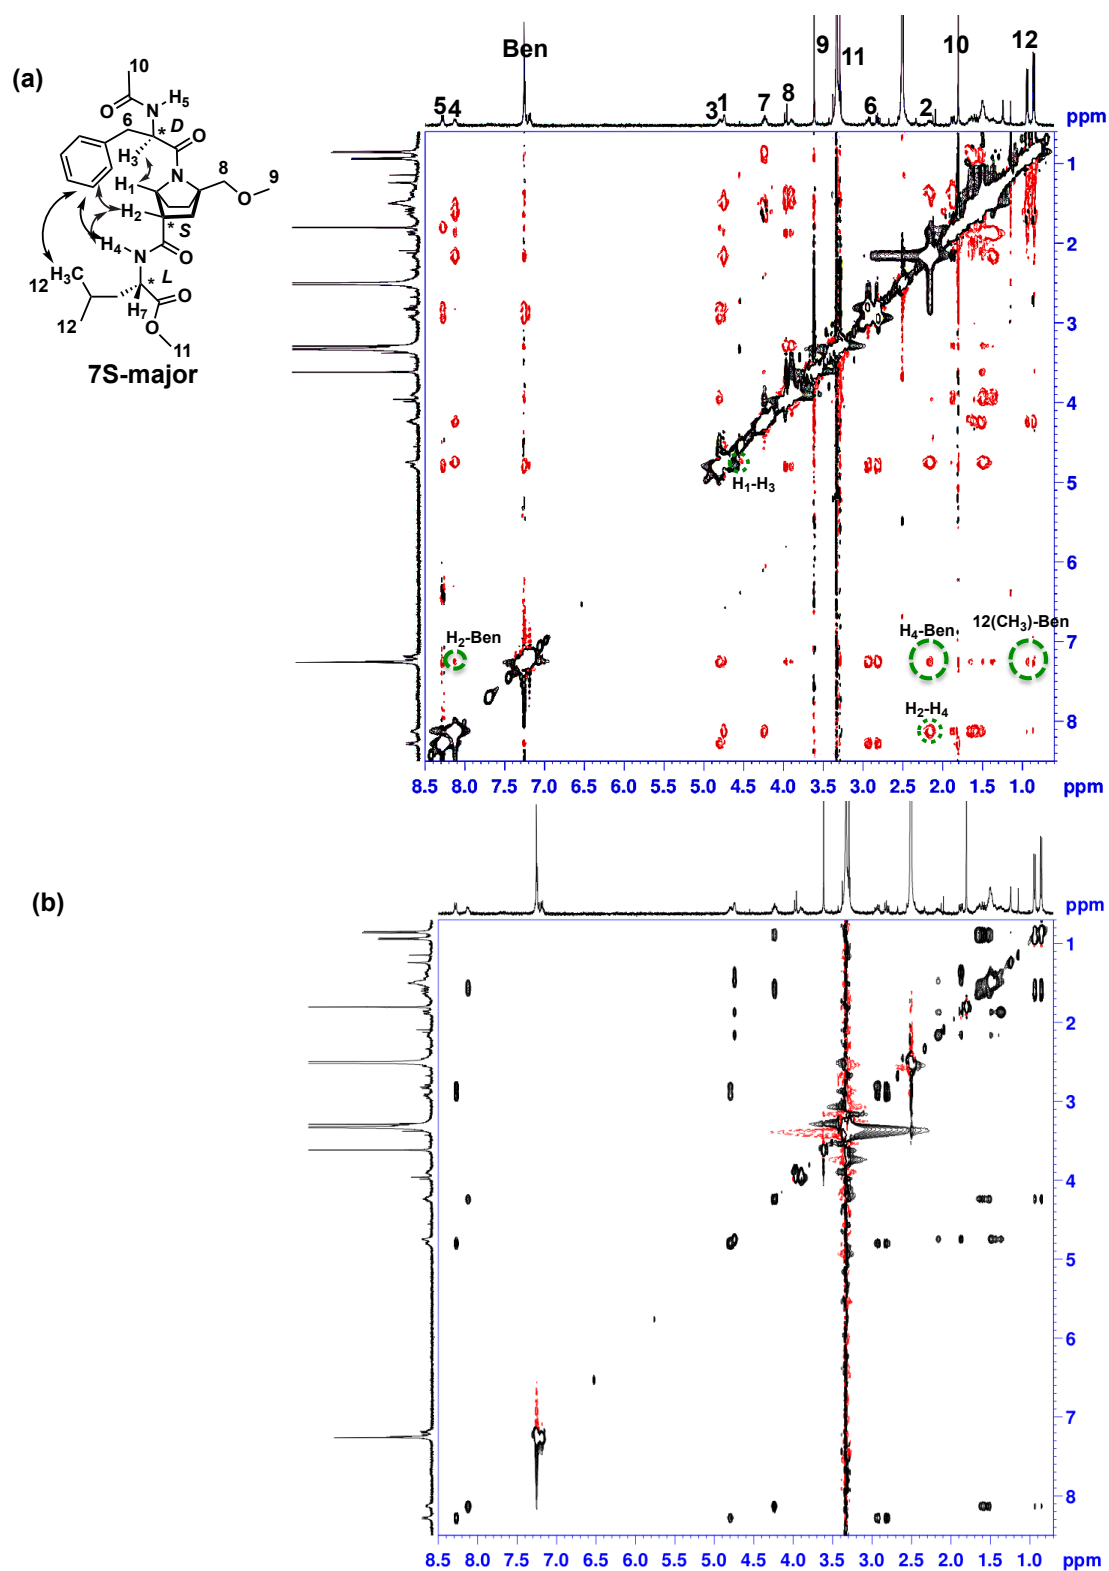

**Figure S13**, (a) ROE of 7S-major and (b) COSY of 7S-major in DMSO at 25 °C.

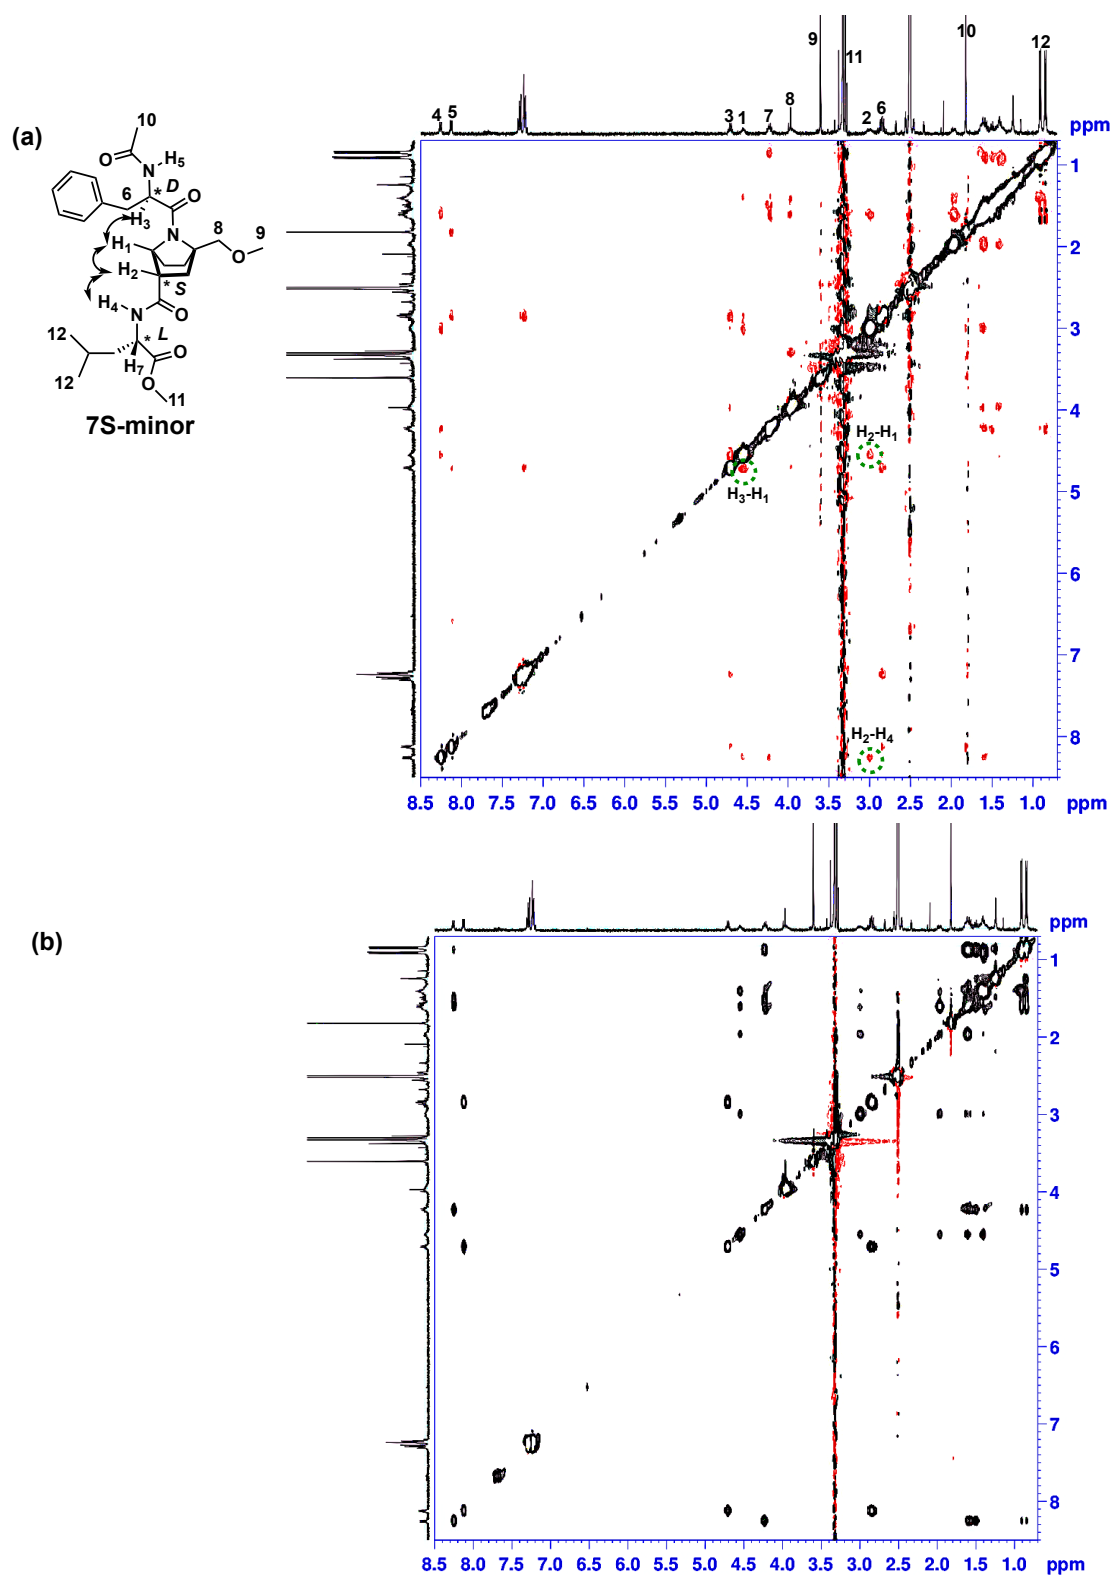

**Figure S14,** (a) ROE of 7S-minor and (b) COSY of 7S-minor in DMSO at 25 °C.

**7S(Ac-(D)-Phe-(S)-Abh-(L)-Leu-OMe)**

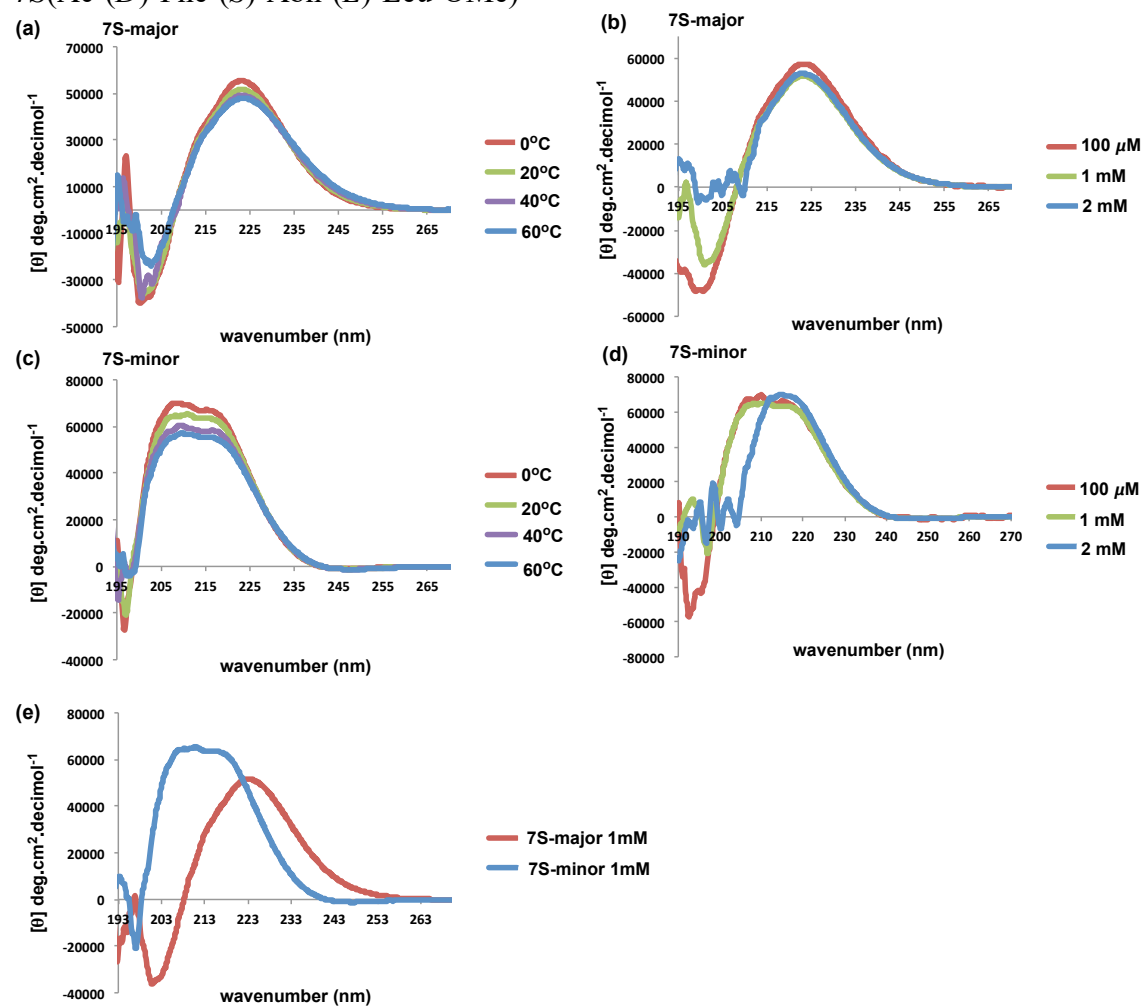

**Figure S15**, (a) temperature-dependent CD of **7S-maj**, (b) concentration-dependent CD of **7S-maj**, (c) temperature-dependent CD of **7S-minor**, (d) concentration-dependent CD of **7S-minor**, and (e) comparison of **7S-maj** and **7S-minor** (at 20°C), in MeOH.

Temperature-dependency and concentration-dependency of CD spectra of **7S-maj** are examined, and we found no significant dependency, suggesting no substantial intermolecular interactions occur and the structural consistency. This is also true for **7S-minor**. In Figure S15e, in comparing the CD spectra of **7S-maj** and **7S-minor**, we find a clear difference. Thus, it suggests that **7S-maj** and **7S-minor** also have different conformations.



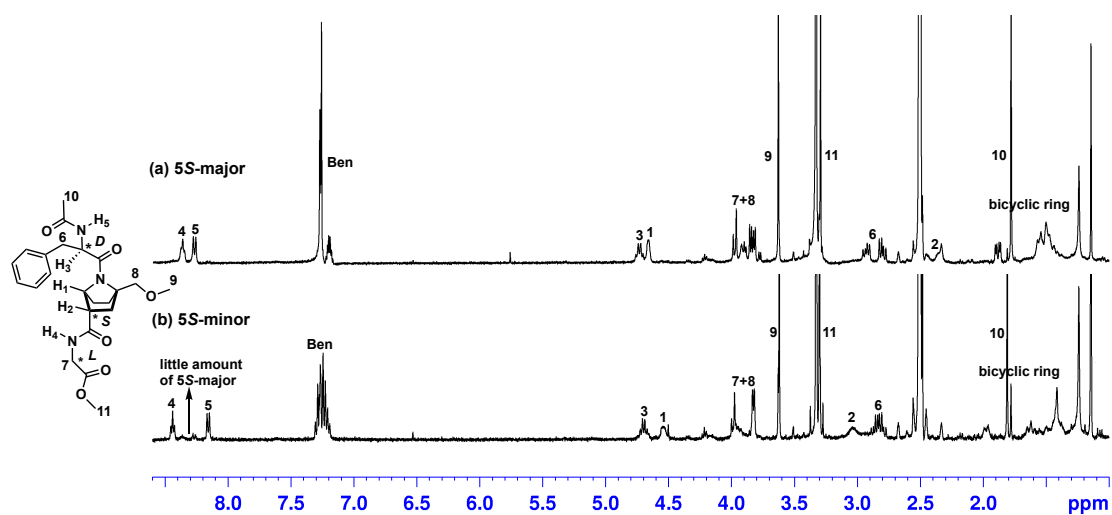

**Figure S16, (a)**  $^1\text{H}$ -NMR of **5S-major** in DMSO at 35 °C. **(b)**  $^1\text{H}$ -NMR of **5S-minor** in DMSO at 35 °C.

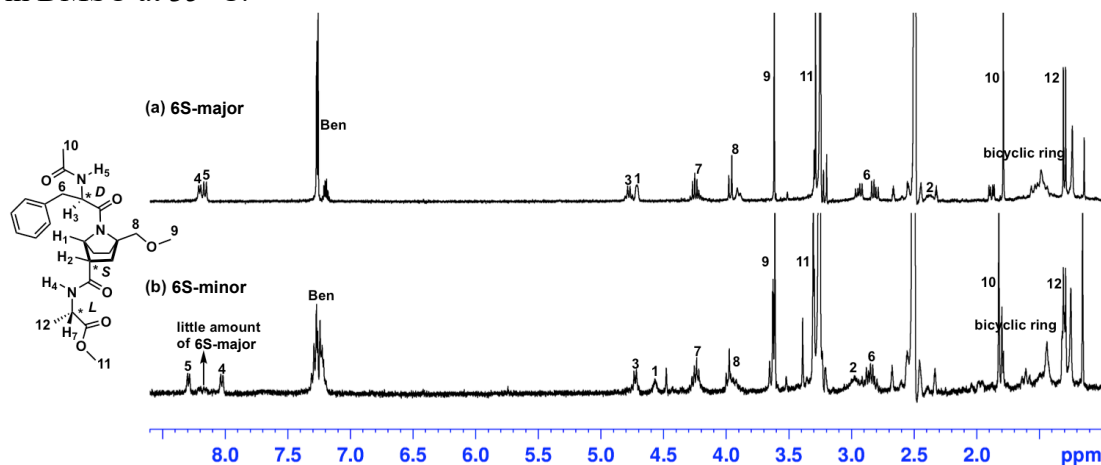

**Figure S17, (a)**  $^1\text{H}$ -NMR of **6S-major** in DMSO at 35 °C. **(b)**  $^1\text{H}$ -NMR of **6S-minor** in DMSO at 35 °C.

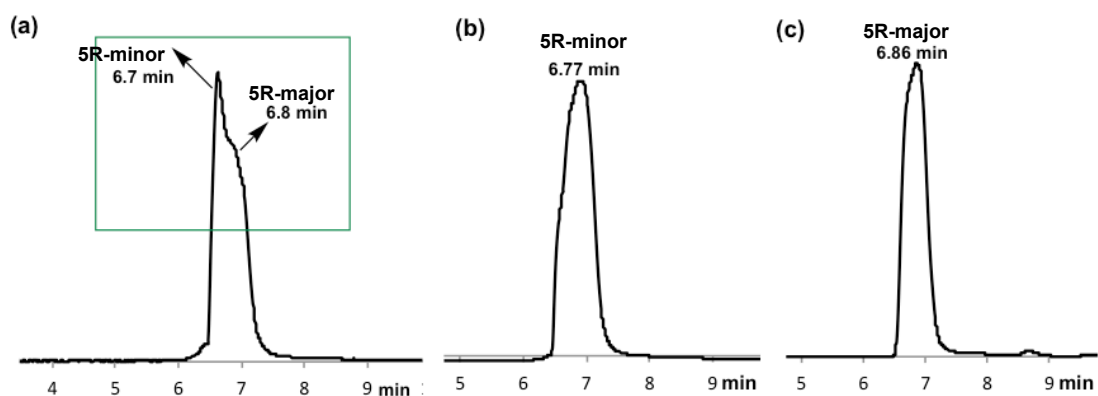

**Figure S18.** Reverse-phase HPLC ( $\text{CH}_3\text{CN}$  100%, 256 nm) **(a)** tripeptide **5(minor+major)** **(b)** isolated tripeptide **5-minor** and **(c)** **5-major**.

**5R(Ac-(*L*)-Phe-(*R*)-Abh-Gly-OMe)**

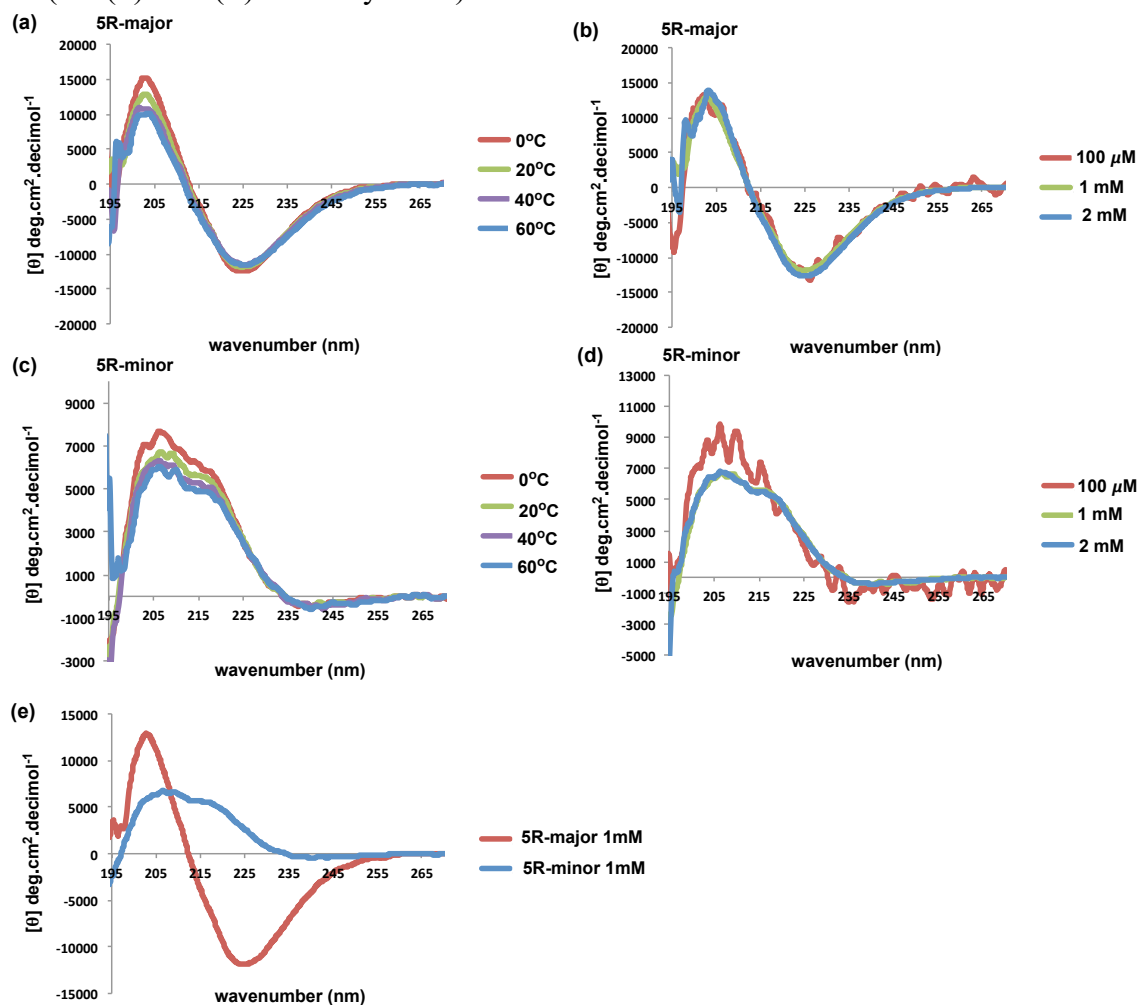

**Figure S19**, (a) temperature-dependent CD of **5R-major**, (b) concentration-dependent CD of **5R-major**, (c) temperature-dependent CD of **5R-minor**, (d) concentration-dependent CD of **5R-minor**, and (e) comparison of **5R-major** and **5R-minor** (at 20°C), in MeOH.

There is no significant temperature-dependency and concentration-dependency of the CD spectra of **5R-major**, suggesting the no substantial intermolecular interactions occur and the structure is consistent. This is also true for **5R-minor**. In Figure S19e, comparing the CD spectra of **5R-major** and **5R-minor**, we found that they have a clear difference in the shape and intensity in a similar manner to those of **7S-major** and **7S-minor**. Thus, it suggests that **5R-major** and **5R-minor** have totally different conformations.

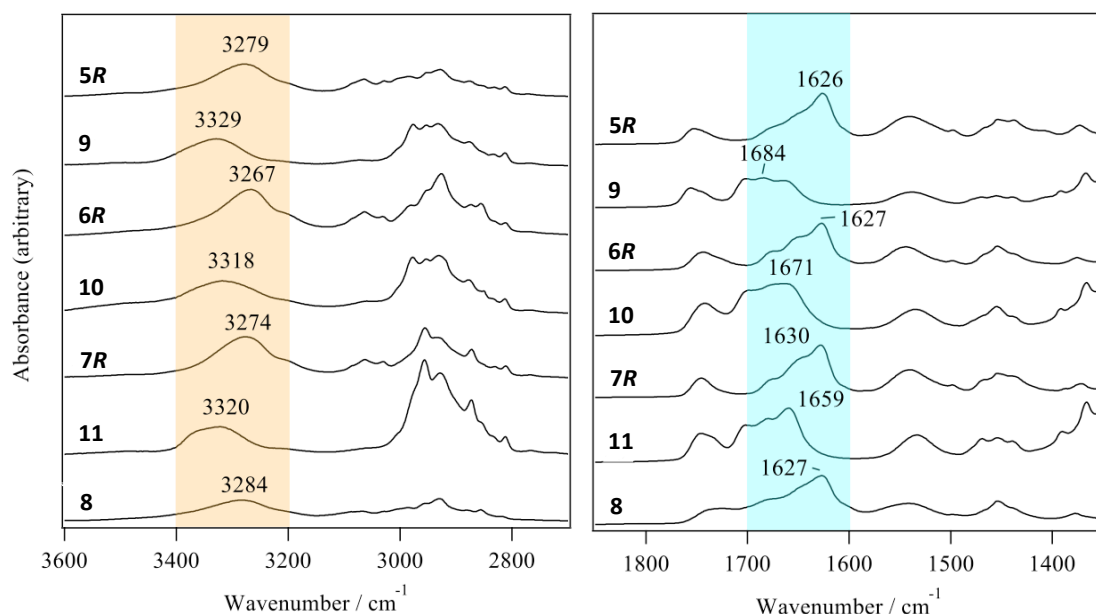

**Figure S20.** ATR-FTIR spectra in the dry film state over the range of 4000-1000  $\text{cm}^{-1}$ .

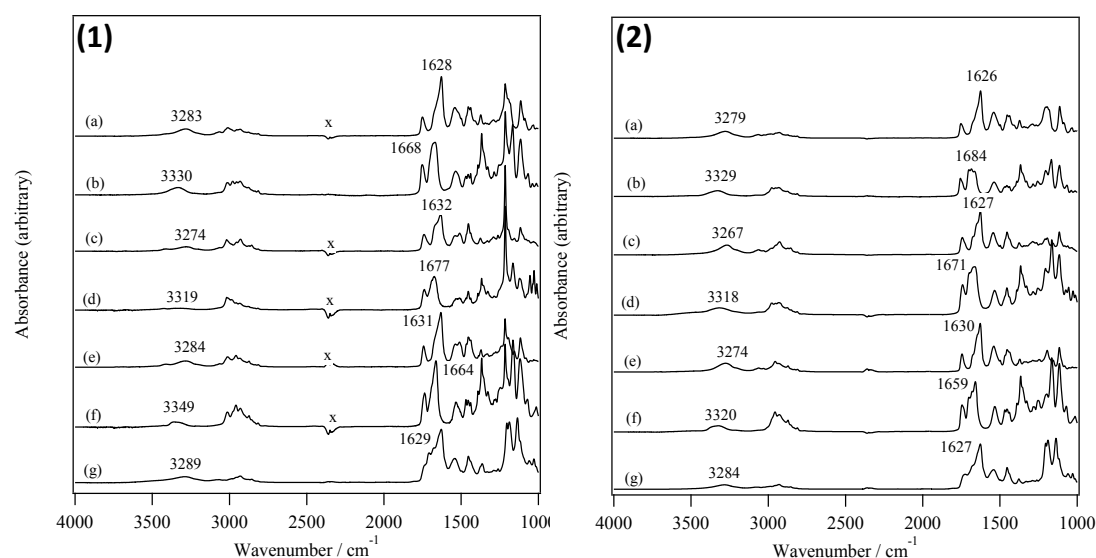

**Figure S21.** (1), Full ATR-FTIR spectra of (a) tripeptide **5R**, (b) dipeptide **9**, (c) tripeptide **6R**, (d) dipeptide **10**, (e) tripeptide **7R**, (f) dipeptide **11** and (g) tetrapeptide **8** in  $\text{CHCl}_3$  solution over the range of 4000-1000  $\text{cm}^{-1}$ . x: band due to  $\text{CO}_2$ . (2), Full ATR-FTIR spectra of (a) **5R**, (b) **9**, (c) **6R**, (d) **10**, (e) **7R**, (f) **11** and (g) **8** in the dry film state over the range of 4000-1000  $\text{cm}^{-1}$ .

Fig. S20 and S21 show the ATR-FTIR spectra of a series of peptides in the dry film state over the range of 4000-1000  $\text{cm}^{-1}$ . As far as the amide A and amide I regions are concerned, the spectral profiles are similar to the corresponding profiles obtained in  $\text{CHCl}_3$  solution, although slight downshifts of the amide A and amide I bands were observed due to intermolecular interactions. We also confirmed that amide A moved together with amide I in the dry film state.

## 2. 2D-NMR spectra

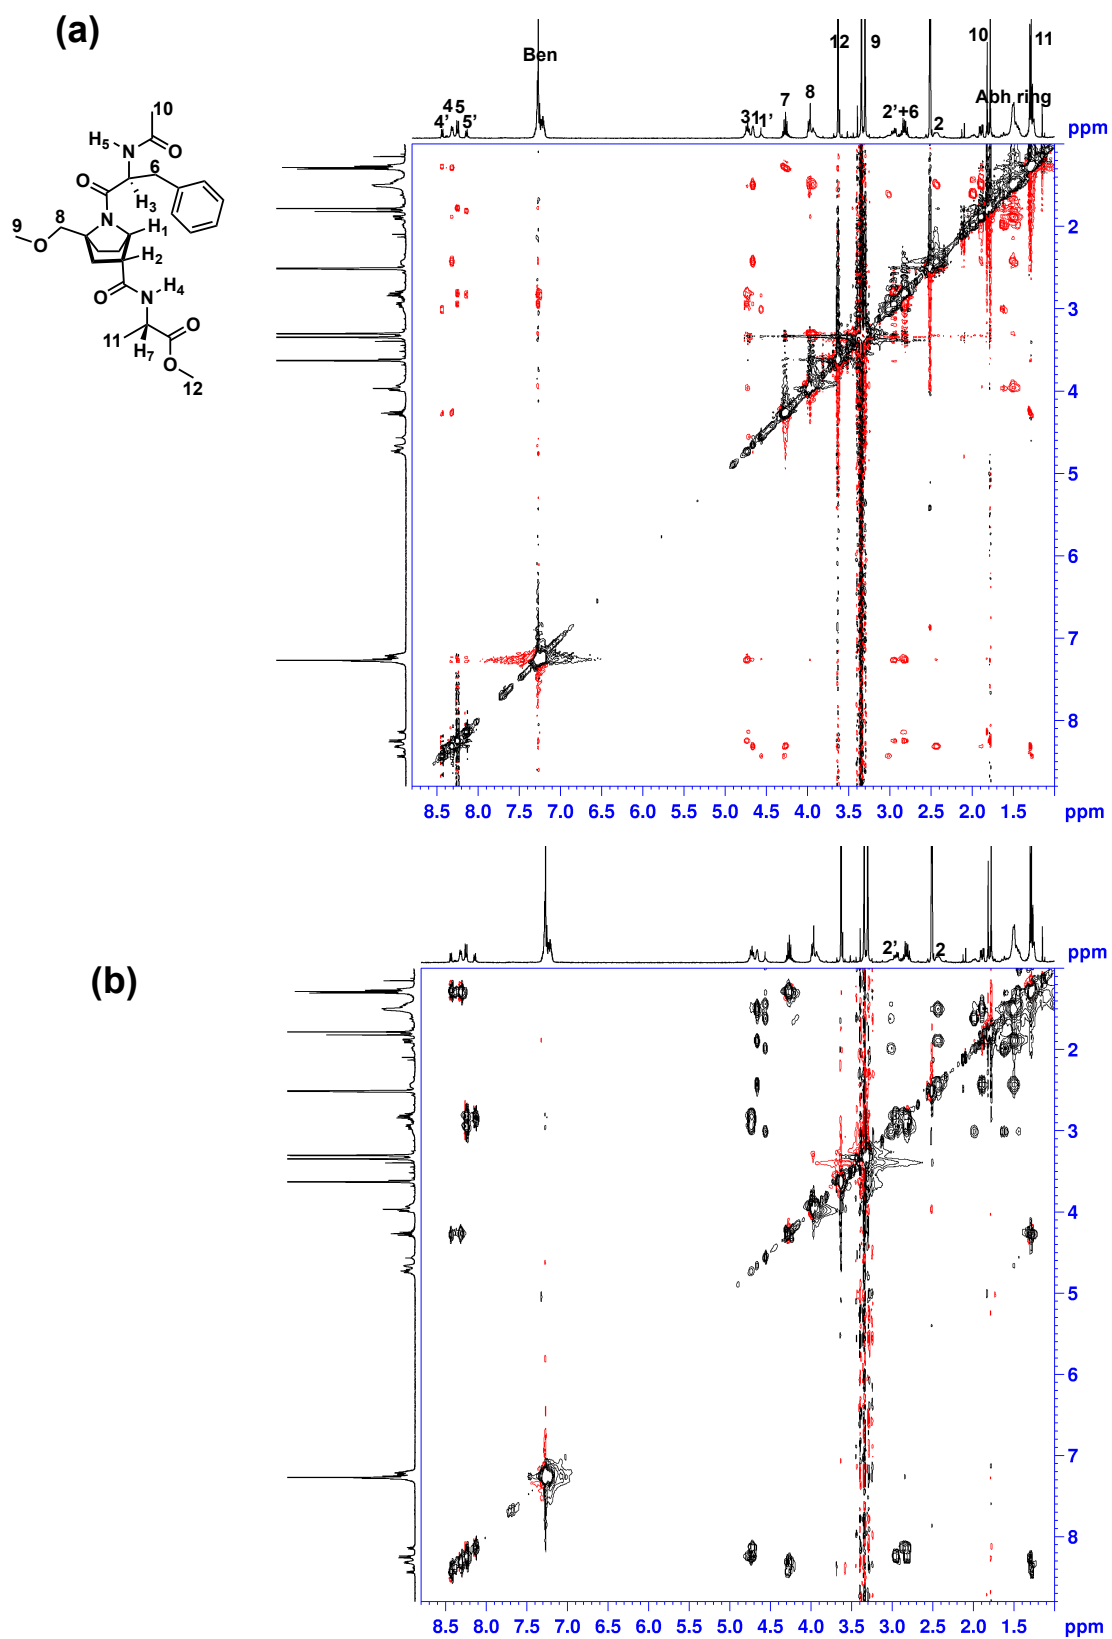

**Figure S22**, (a) ROE of Ac-F-Abh-A-OMe 6R and (b) COSY of Ac-F-Abh-A-OMe 6R in DMSO at 25 °C.

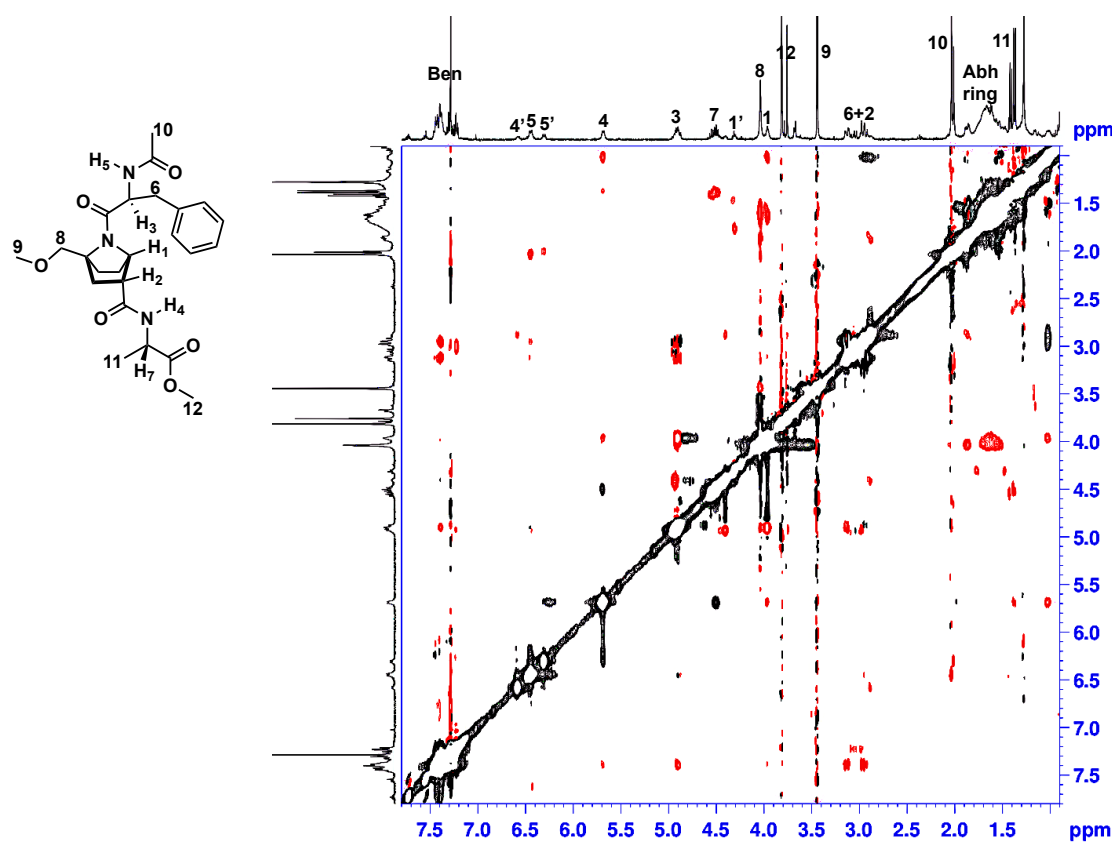

**Figure S23**, ROE of Ac-F-Abh-A-OMe 6R in CDCl<sub>3</sub> at 25 °C.

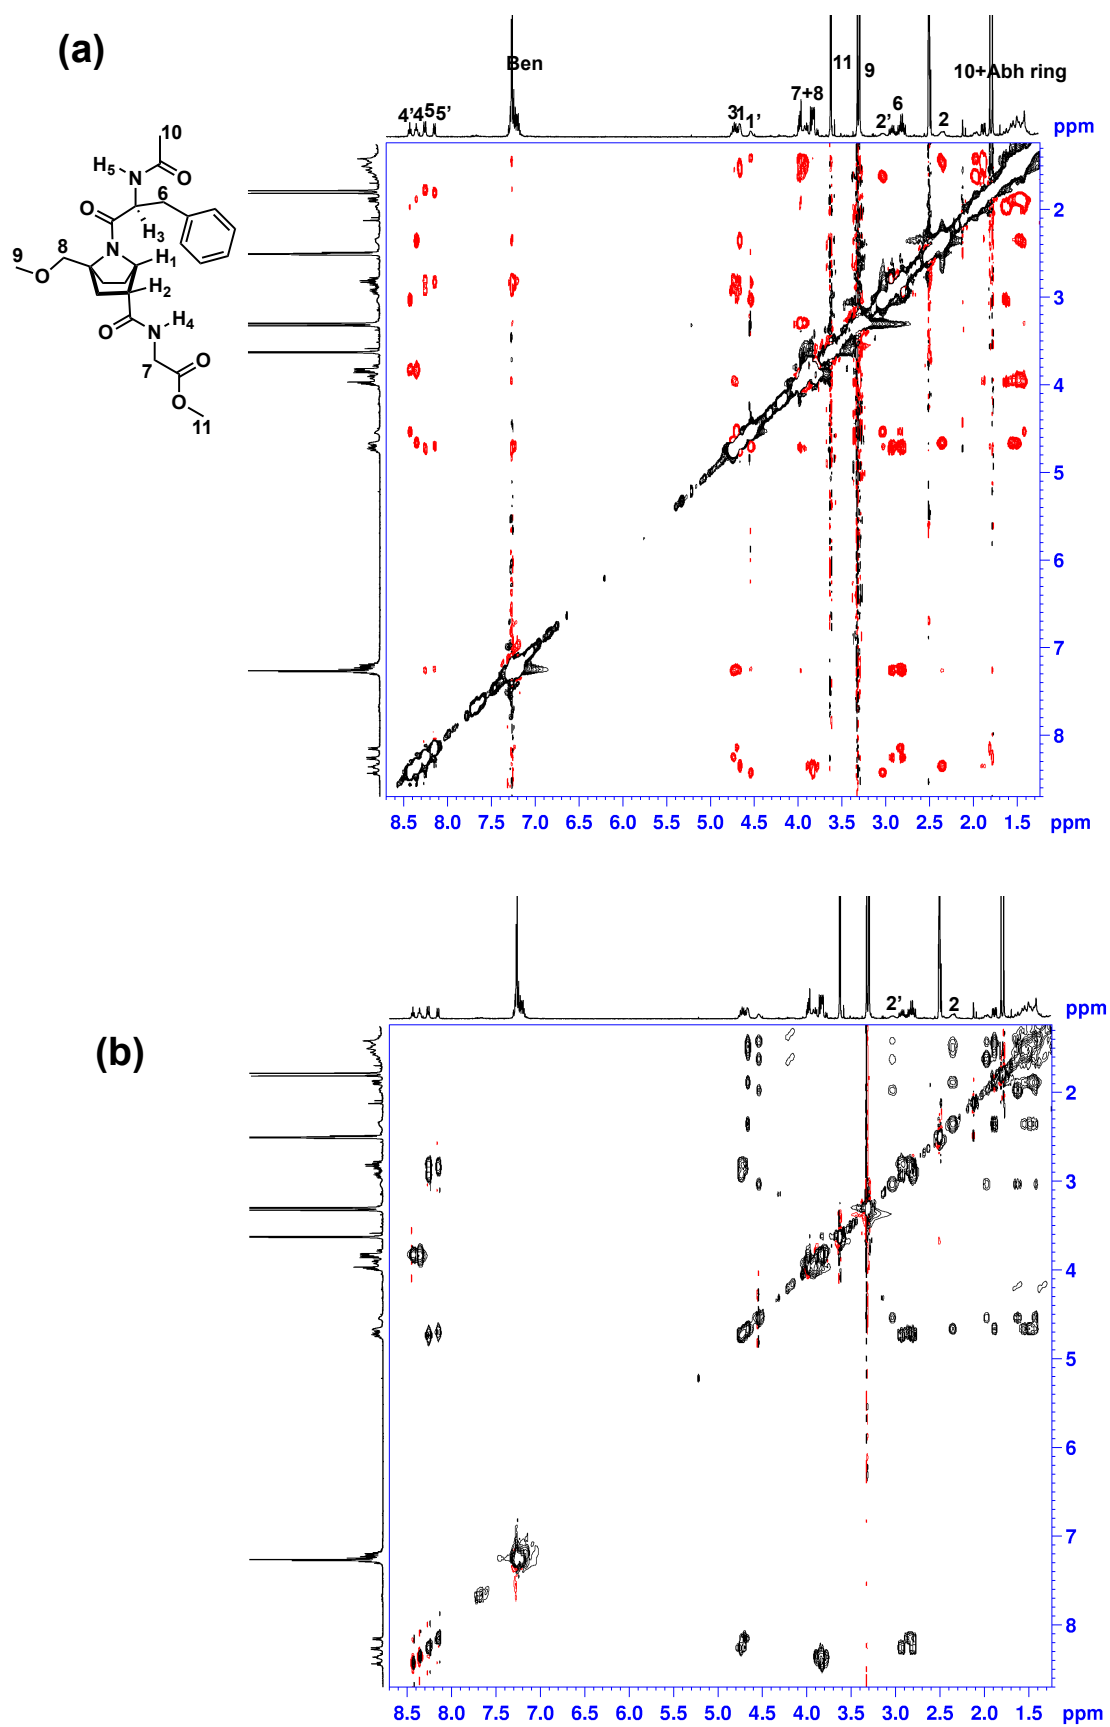

**Figure S24**, (a) ROE of Ac-F-Abh-G-OMe 5R and (b) COSY of Ac-F-Abh-G-OMe 5R in DMSO at 25 °C.

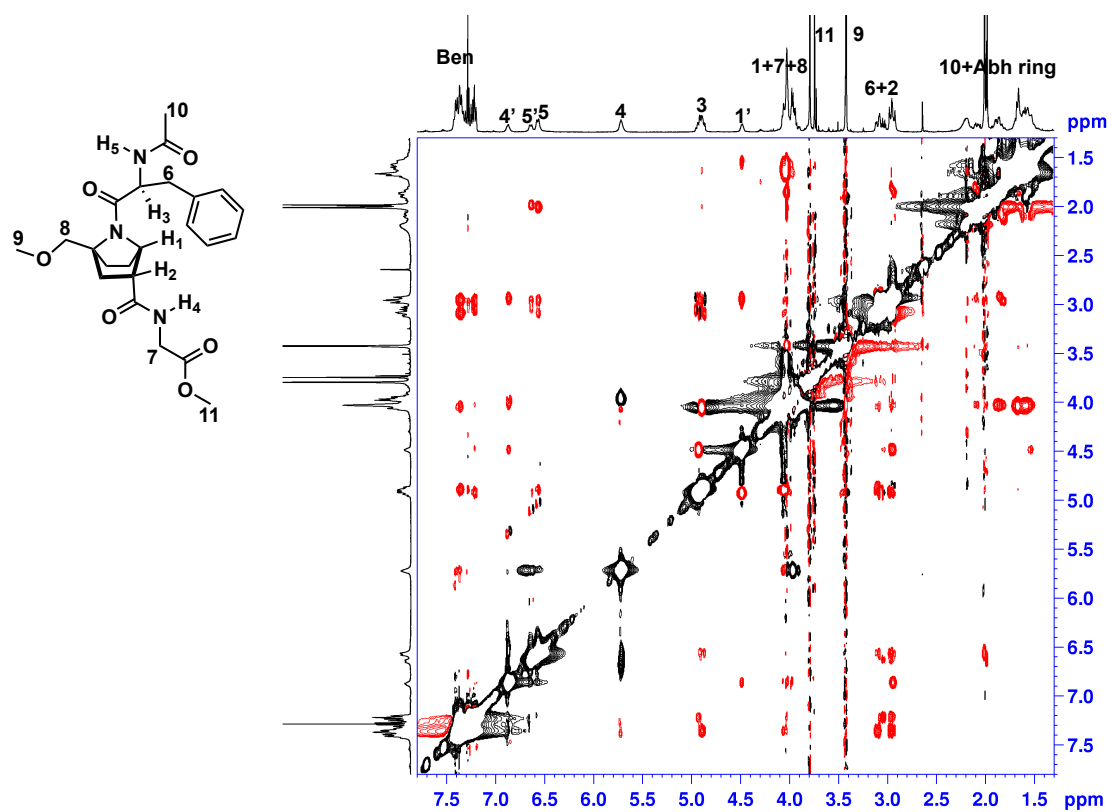

**Figure S25**, ROE of Ac-F-Abh-G-OMe 5R in CDCl<sub>3</sub> at 25 °C.

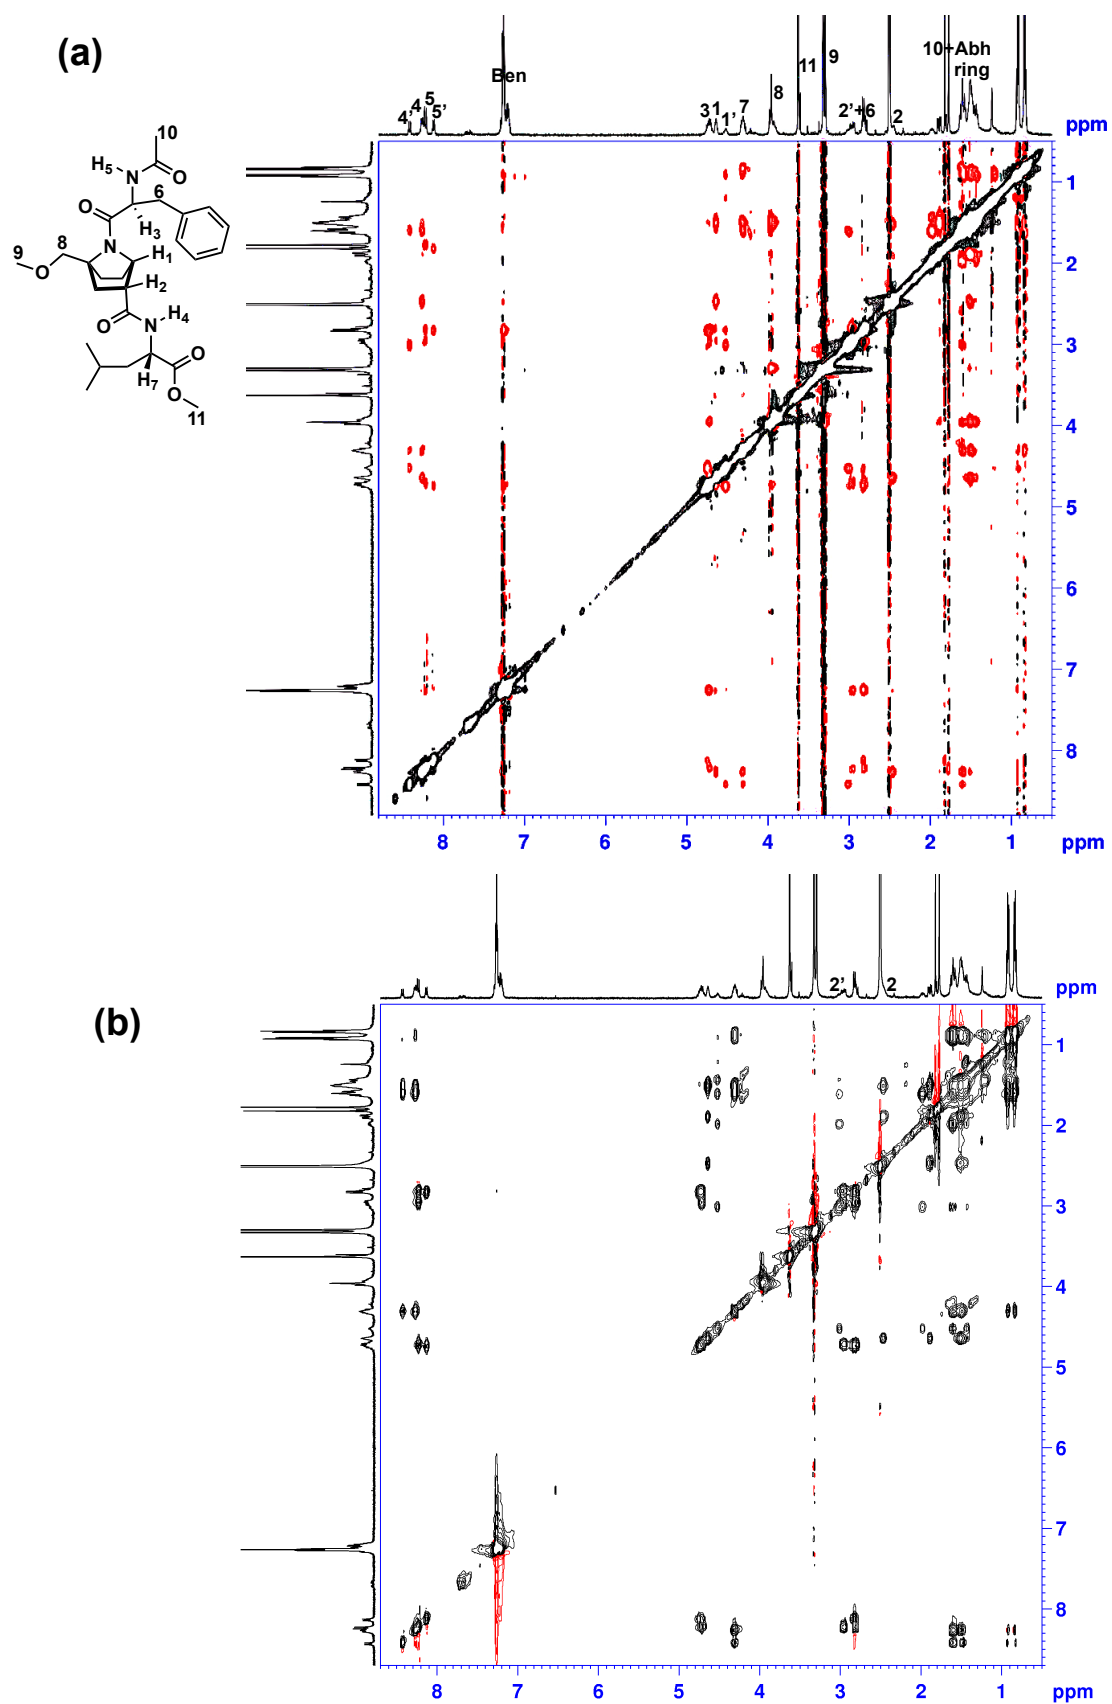

**Figure S26,** (a) ROE of Ac-F-Abh-L-OMe 7R and (b) COSY of Ac-F-Abh-L-OMe 7R in DMSO at 25 °C.



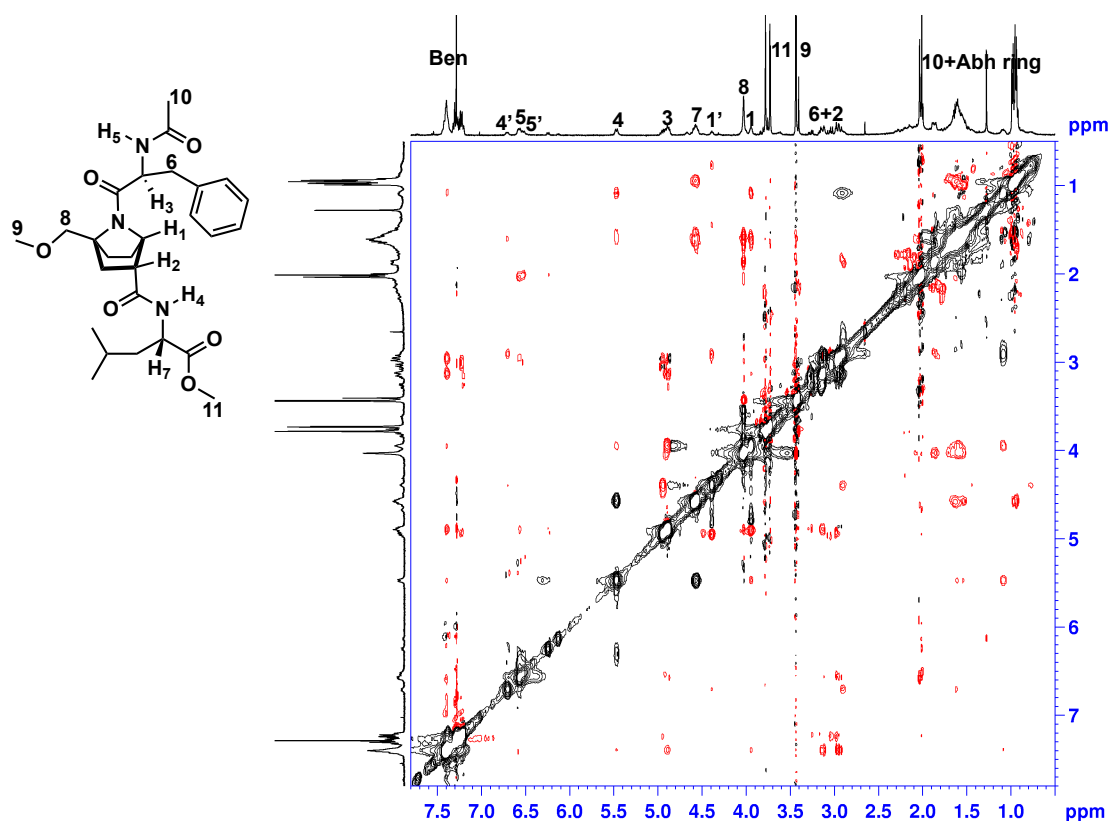

**Figure S27**, ROE of Ac-F-Abh-L-OMe 7R in  $\text{CDCl}_3$  at 25 °C.

### 3. Experiment section of Synthesis

#### General methods

Open column chromatography was carried out on silica gel (silica gel 60N (100-210  $\mu\text{m}$ ), Kanto Chemicals, Japan). All the NMR experiments were recorded on a Bruker Avance 400 NMR spectrometer.  $^1\text{H}$ -NMR and  $^{13}\text{C}$ -NMR chemical shifts ( $\delta$ ) were calibrated with the solvent peak and are shown in ppm. Coupling constants are given in Hz. Mass spectra were recorded on a Bruker microTOF-05. HPLC data were obtained using a Hitachi instrument with Mightysil RP-18 GP Aqua (250 mm x 10 mm) for a reverse phase column. Flow rate: 2.0 ml/min.

22

## Enantio-purity check<sup>1</sup>

The R/S enantio-separation was achieved by coupling (1*S*, 2*R*, 4*R*)-(-)-2, 10-camphorsultam to the C-terminal of Abh amino acid, followed by column chromatography or normal phase HPLC. From <sup>1</sup>H-NMR, the chemical shift of bicyclic β-amino acid enantiomers is different. The chemical shift difference of **20R/20S** is shown below.

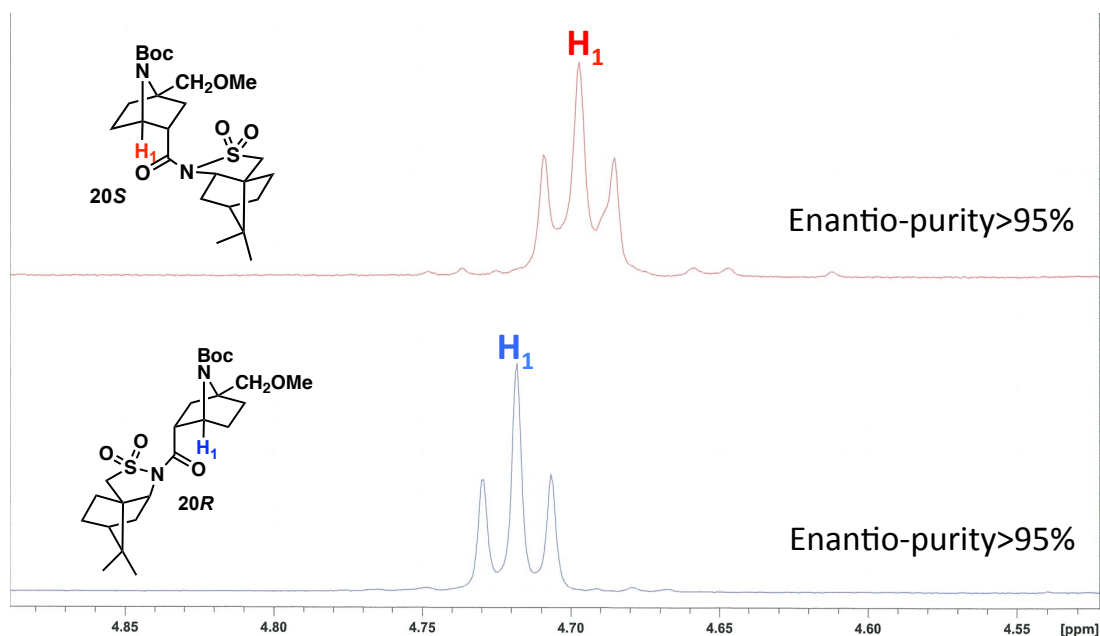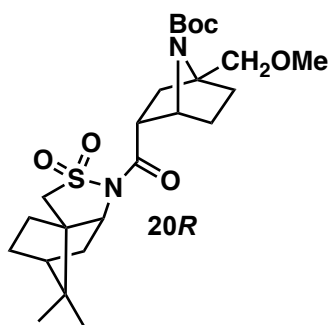

<sup>1</sup>H NMR (CDCl<sub>3</sub>, 400MHz) δ 4.730-4.707 (1H, m), 4.118-4.064 (1H, m), 4.023-3.998 (1H, m), 3.895-3.871 (1H, m), 3.856-3.824 (1H, m), 3.612-3.559 (1H, m), 3.468-3.429 (1H, m) 3.385 (3H, s), 2.067-1.611 (12H, m), 1.434 (9H, s), 1.114 (3H, s), 0.938 (3H, s).

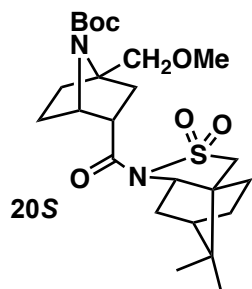

$^1\text{H}$  NMR ( $\text{CDCl}_3$ , 400MHz)  $\delta$  4.709-4.686 (1H, m), 4.039-4.015 (1H, m), 3.896-3.864 (2H, m), 3.649-3.583 (1H, m), 3.514-3.442 (2H, m), 3.409 (3H, s), 2.251-1.611 (12H, m), 1.454 (9H, s), 1.127 (3H, s), 0.962 (3H, s).

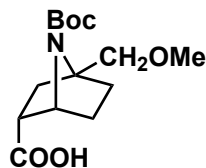

**21R**

$^1\text{H}$  NMR ( $\text{CDCl}_3$ , 400MHz)  $\delta$  4.516-4.493 (1H, m), 3.976-3.9951 (2H, m), 3.422 (3H, s), 3.128-3.102 (1H, m), 2.038-1.454 (6H, m), 1.454 (9H, s)  $^{13}\text{C}$ -NMR (100 MHz,  $\text{CDCl}_3$ ): 176.61, 155.12, 80.390, 74.09, 68.46, 60.58, 59.54, 45.27, 36.04, 33.09, 28.48, 24.87. HRMS (ESI,  $[\text{M}-\text{H}]^-$ ): Calcd. for  $\text{C}_{14}\text{H}_{22}\text{NO}_5^-$ , 284.1503. Found: 284.1517.

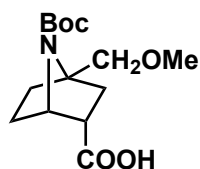

**21S**

$^1\text{H}$  NMR ( $\text{CDCl}_3$ , 400MHz)  $\delta$  4.488-4.464 (1H, m), 3.951-3.875 (2H, m), 3.396 (3H, s), 3.102-3.053 (1H, m), 1.990-1.593 (6H, m), 1.427 (9H, s)  $^{13}\text{C}$ -NMR (100 MHz,  $\text{CDCl}_3$ ): 177.634, 155.056, 80.376, 74.009, 68.374, 62.889, 59.427, 45.432, 35.910, 33.007, 28.40, 24.79. HRMS (ESI,  $[\text{M}-\text{H}]^-$ ): Calcd. for  $\text{C}_{14}\text{H}_{22}\text{NO}_5^-$ , 284.1503. Found: 284.1498.

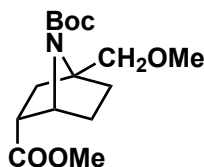

**22R**

$^1\text{H}$  NMR ( $\text{CDCl}_3$ , 400MHz)  $\delta$  4.467-4.444 (1H, m), 3.974-3.897 (2H, m), 3.701 (3H, s), 3.422 (3H, s), 3.090-3.032 (1H, m), 2.071-1.688 (6H, m), 1.452 (9H, s)  $^{13}\text{C}$ -NMR (100 MHz,  $\text{CDCl}_3$ ): 173.20, 155.16, 80.22, 74.13, 68.42, 60.67, 59.53, 52.02, 45.48, 36.11, 33.07, 28.48, 24.89. HRMS (ESI,  $[\text{M}+\text{Na}]^+$ ): Calcd. for  $\text{C}_{15}\text{H}_{25}\text{NNaO}_5^+$ , 322.1625. Found: 322.1638.

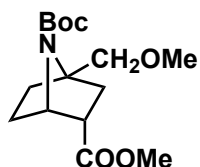

**22S**

$^1\text{H}$  NMR ( $\text{CDCl}_3$ , 400MHz)  $\delta$  4.433-4.409 (1H, m), 3.936-3.858 (2H, m), 3.663 (3H, s), 3.381 (3H, s), 3.040-2.999 (1H, m), 2.033-1.606 (6H, m), 1.415 (9H, s)  $^{13}\text{C}$ -NMR (100 MHz,  $\text{CDCl}_3$ ): 173.106, 155.060, 80.165, 73.994, 68.320, 60.560, 59.412,

51.948, 45.375, 36.002, 32.976, 28.374, 24.795. HRMS (ESI,  $[M+Na]^+$ ): Calcd. for  $C_{15}H_{25}NNaO_5^+$ , 322.1625. Found: 322.1615.

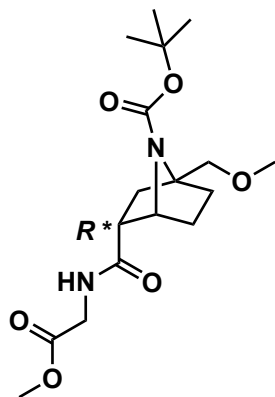

#### Boc-Abh(OMe)-Gly-OMe

To a solution of 21R (50 mg, 0.18 mmol) in  $CH_2Cl_2$  (2 mL) were added  $NH_2$ -Gly-OMe.HCl (33 mg, 0.26 mmol), CDMT (63 mg, 0.36 mmol), DMAP (2 mg) and NMM (99  $\mu$ l, 0.9 mmol) at 0 °C. The reaction mixture was allowed to warm to room temperature, and stirred for 24 h. The reaction mixture was diluted with  $Et_2O$ , washed with 1M aqueous solution of HCl and saturated aqueous solution of  $NaHCO_3$ , and the organic layer was dried over  $Na_2SO_4$ . The solution was concentrated, and the residue was purified with column chromatography (Hexane/ $EtOAc$  = 1/1) to afford Boc-Abh(OMe)-Gly-OMe (48 mg, 77%), as colorless oil.

$^1H$  NMR ( $CDCl_3$ , 400MHz)  $\delta$  6.044-6.020 (1H, m), 4.421-4.402 (1H, m), 4.061-4.042 (2H, m), 3.944-3.873 (2H, m), 3.764 (3H, s), 3.418 (3H, s), 3.013-2.959 (1H, m), 2.106-1.690 (6H, m), 1.458 (9H, s).  $^{13}C$ -NMR (100 MHz,  $CDCl_3$ ): 171.72, 170.51, 155.34, 80.35, 73.98, 68.67, 61.23, 59.50, 52.57, 46.43, 41.48, 35.91, 33.24, 28.52, 24.17. HRMS (ESI,  $[M+Na]^+$ ): Calcd. for  $C_{17}H_{28}N_2NaO_6^+$ , 379.1840. Found: 379.1850.

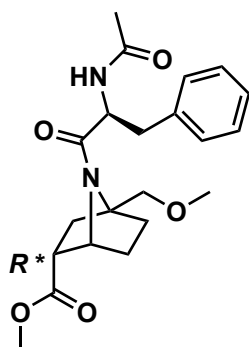

#### Ac-Phe-Abh(OMe)-OMe

To a solution of 22R (30 mg, 0.1 mmol) in  $CH_2Cl_2$  (1 mL) was added TFA (1.0 mL) at 0 °C. The reaction mixture was allowed to warm to room temperature, and stirred for 20 min. The reaction was then quenched with 2 M aqueous solution of NaOH. The resulting solution was extracted with  $EtOAc$  (3 times). The combined organic layer was dried over  $Na_2SO_4$ , and filtered. The solvent was evaporated to afford crude

amine, which was used in the next reaction without further purification. To a solution of crude amine in  $\text{CH}_2\text{Cl}_2$  (2 mL) were added Ac-Phe-OH (31 mg, 0.15 mmol), CDMT (35 mg, 0.2 mmol), DMAP (2 mg) and NMM (55  $\mu\text{l}$ , 0.5 mmol) at 0 °C. The reaction mixture was allowed to warm to room temperature, and stirred for 24 h. The reaction mixture was diluted with  $\text{Et}_2\text{O}$ , washed with 1M aqueous solution of HCl and saturated aqueous solution of  $\text{NaHCO}_3$ , and the organic layer was dried over  $\text{Na}_2\text{SO}_4$ . The solution was concentrated, and the residue was purified with column chromatography (Hexane/ $\text{EtOAc}$  = 1/1) to afford Ac-Phe-Abh(OMe)-OMe (24 mg, 62 %), as colorless oil.

$^1\text{H}$  NMR ( $\text{CDCl}_3$ , 400MHz)  $\delta$  7.278-7.176 (5H, m), 6.572 (1H, d,  $J=8.08\text{Hz}$ ), 4.908-4.850 (1H, m), 4.414-4.271 (1H, m), 4.001 (2H, brs), 3.642 (3H, d), 3.401 (3H, s), 2.999-2.965 (3H, m), 1.965 (3H, s), 1.888-1.428 (6H, m).  $^{13}\text{C}$ -NMR (100 MHz,  $\text{CDCl}_3$ ): 172.28, 169.91, 169.71, 136.52, 129.74, 128.67, 127.22, 73.69, 69.19, 60.36, 59.44, 53.94, 52.83, 52.05, 44.62, 39.96, 31.69, 31.03, 29.37. HRMS (ESI,  $[\text{M}+\text{Na}]^+$ ): Calcd. for  $\text{C}_{21}\text{H}_{28}\text{N}_2\text{NaO}_5^+$ , 411.1890. Found: 411.1873.

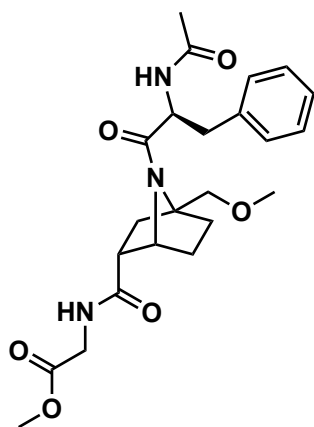

#### Ac-Phe-Abh(OMe)-Gly-OMe

To a solution of Ac-Phe-Abh(OMe)-OMe (24 mg, 0.06 mmol) in THF (2 mL) was added a solution of  $\text{LiOH}\cdot\text{H}_2\text{O}$  (5 mg, 0.12 mmol) in  $\text{H}_2\text{O}$  (1 mL) at rt. MeOH (0.5 mL) was added to the reaction mixture and the mixture was stirred for 12 h at rt. The reaction mixture was poured into 5% aqueous solution of  $\text{KHSO}_4$ , and the whole was extracted with  $\text{CHCl}_3$  ( $\times 3$  times). The combined organic phase was washed with brine, dried over  $\text{Na}_2\text{SO}_4$ , and the solvent was evaporated. Compound Ac-Phe-Abh(OMe)-OH (24 mg, 100%) was afforded, which was used in the next reaction without further purification.

To a solution of crude carboxyl acid in  $\text{CH}_2\text{Cl}_2$  (2 mL) were added  $\text{NH}_2\text{-Gly-OMe}\cdot\text{HCl}$  (11 mg, 0.09), CDMT (21 mg, 0.12 mmol), DMAP (2 mg) and NMM (33  $\mu\text{l}$ , 0.3 mmol) at 0 °C. The reaction mixture was allowed to warm to room temperature, and stirred for 24 h. The reaction mixture was diluted with  $\text{Et}_2\text{O}$ , washed with 1M aqueous solution of HCl and saturated aqueous solution of  $\text{NaHCO}_3$ , and the organic layer was dried over  $\text{Na}_2\text{SO}_4$ . The solution was concentrated, and the residue was purified with column chromatography ( $\text{EtOAc}:\text{MeOH}=20:1$ ) to afford **Ac-Phe-Abh(OMe)-Gly-OMe** (19 mg, 71 %), as a colorless oil.

$^1\text{H}$ -NMR (400 MHz,  $\text{CDCl}_3$ )  $\delta$  7.385-7.173 (5H, m), 6.835 (0.3H, s), 6.560 (0.3H, d,  $J=8.44\text{Hz}$ ), 6.515 (0.7H, d,  $J=7.52\text{Hz}$ ), 5.675 (0.7H, s), 4.916-4.839 (1H, m), 4.4531 (0.4H, brs), 4.041-3.920 (4.6H, m), 3.772-3.706 (3H, m), 3.412-3.398 (3H, m), 3.100-2.899 (3H, m), 2.151-1.438 (9H, m).  $^{13}\text{C}$ -NMR (100 MHz,  $\text{CDCl}_3$ ): 170.91, 170.74, 170.46, 170.32, 169.56, 169.53, 167.86, 167.13, 137.34, 136.29, 130.21, 129.53, 128.82, 128.63, 127.48, 127.21, 73.71, 73.59, 69.64, 69.52, 61.43, 61.32, 59.40, 53.96, 53.10, 52.82, 52.55, 52.39, 48.03, 45.44, 41.41, 41.38, 40.46, 39.40, 35.49, 34.11, 33.24, 31.95, 31.86, 29.39, 23.38, 23.28. HRMS (ESI,  $[\text{M}+\text{H}]^+$ ): Calcd. for  $\text{C}_{23}\text{H}_{32}\text{N}_3\text{O}_6^+$ , 446.2286. Found: 446.2294. Reverse-phase HPLC ( $\text{CH}_3\text{CN}$  100%, 215 nm):  $t_R$  7.06 min, >95% purity.

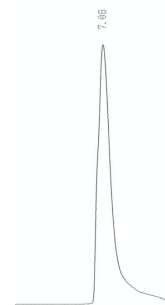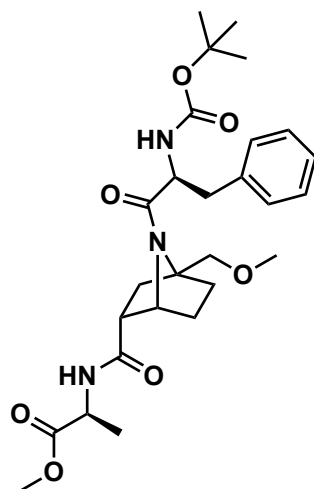

#### Boc-Phe-Abh(OMe)-Ala-OMe

To a solution of Boc-*R*-Abh(OMe)-Ala-OMe<sup>1</sup> (28 mg, 0.08 mmol) in  $\text{CH}_2\text{Cl}_2$  (1 mL) was added TFA (1.0 mL) at 0 °C. The reaction mixture was allowed to warm to room temperature, and stirred for 20 min. The reaction was then quenched with 2 M aqueous solution of NaOH. The resulting solution was extracted with EtOAc (3 times). The combined organic layer was dried over  $\text{Na}_2\text{SO}_4$ , and filtered. The solvent was evaporated to afford crude amine, which was used in the next reaction without further purification. To a solution of crude amine in  $\text{CH}_2\text{Cl}_2$  (2 mL) were added Boc-Phe-OH (32 mg, 0.12 mmol), CDMT (28 mg, 0.16 mmol), DMAP (2 mg) and NMM (44  $\mu\text{l}$ , 0.4 mmol) at 0 °C. The reaction mixture was allowed to warm to room temperature, and stirred for 24 h. The reaction mixture was diluted with  $\text{Et}_2\text{O}$ , washed with 1M aqueous solution of HCl and saturated aqueous solution of  $\text{NaHCO}_3$ , and the organic layer was dried over  $\text{Na}_2\text{SO}_4$ . The solution was concentrated, and the residue was purified with column chromatography (Hexane/EtOAc = 1/1) to afford Boc-Phe-Abh(OMe)-Ala-OMe (29 mg, 69 %), as colorless oil.

$^1\text{H}$  NMR ( $\text{CDCl}_3$ , 400MHz)  $\delta$  7.396-7.191 (5H, m), 6.489 (0.3H, d,  $J=5.88\text{Hz}$ ), 5.661 (0.7H, d,  $J=6.04\text{Hz}$ ), 5.433 (0.7H, d,  $J=6.96\text{Hz}$ ), 5.292 (0.3H, d,  $J=0.8\text{Hz}$ ), 4.592-4.459 (2H, m), 4.0256 (2H, s), 3.954 (1H, s), 3.782-3.726 (3H, m), 3.409-3.405 (3H, m), 3.105-2.896 (3H, m), 1.864-1.371 (6H, m), 1.409 (9H, s), 1.335 (3H, d,  $J=7.12\text{Hz}$ ).  $^{13}\text{C}$ -NMR (100 MHz,  $\text{CDCl}_3$ ): 173.49, 173.41, 170.16, 169.99, 168.44, 167.41, 155.68, 155.24, 137.65, 136.72, 130.20, 129.61, 128.85, 128.56, 127.54,

127.05, 80.30, 80.01, 73.82, 69.41, 69.31, 61.42, 59.45, 54.51, 54.12, 52.68, 52.56, 48.31, 48.08, 45.59, 40.92, 39.81, 35.36, 34.28, 33.34, 32.12, 28.49, 28.48, 27.93, 25.19, 18.90, 18.46. HRMS (ESI,  $[M+Na]^+$ ): Calcd. for  $C_{27}H_{39}N_3NaO_7^+$ , 540.2680. Found: 540.2696.

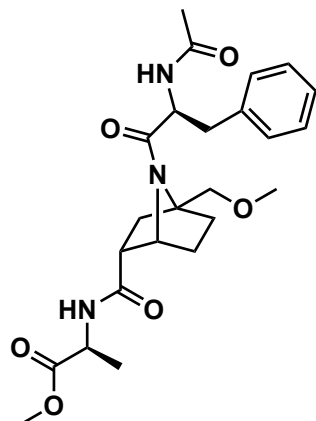

#### Ac-Phe-Abh(OMe)-Ala-OMe

To a solution of Boc-Phe-Abh(OMe)-Ala-OMe (28 mg, 0.05 mmol) in  $CH_2Cl_2$  (1 mL) was added TFA (1.0 mL) at 0 °C. The reaction mixture was allowed to warm to room temperature, and stirred for 20 min. The solvent was evaporated to afford crude amine, which was used in the next reaction without further purification. To a solution of crude amine in  $CH_2Cl_2$  (2 mL) was added  $Ac_2O$  (24  $\mu$ L, 0.25 mmol) and  $Et_3N$  (21  $\mu$ L, 0.15 mmol) at 0 °C. The reaction mixture was allowed to warm to room temperature, and stirred for overnight. The solution was concentrated, and the residue was purified with column chromatography (EtOAc/MeOH = 20/1) to afford Ac-Phe-Abh(OMe)-Ala-OMe (20 mg, 87%) as a colorless oil.

$^1H$ -NMR (400 MHz, DMSO)  $\delta$  8.435 (0.3H, d,  $J=7.12$ Hz), 8.316 (0.7H, d,  $J=6.6$ Hz), 8.248 (0.7H, d,  $J=8.2$ Hz), 8.141 (0.3H, d,  $J=7.44$ Hz), 7.281-7.188 (5H, m), 4.743-4.706 (1H, m), 4.660 (0.7H, brs), 4.564 (0.3H, brs), 4.283-4.248 (1H, m), 3.998-3.931 (2H, m), 3.630-3.608 (3H, m), 3.304-3.297 (3H, m), 2.942-2.786 (2.3H, m), 2.434 (0.7H, m), 1.995-1.492 (9H, m), 1.299-1.264 (3H, m).  $^{13}C$ -NMR (100 MHz, DMSO): 173.18, 173.07, 170.20, 170.12, 169.15, 168.79, 168.12, 168.01, 137.49, 137.31, 129.50, 129.46, 128.09, 128.03, 126.48, 126.38, 79.31, 78.99, 78.65, 74.11, 68.39, 68.23, 59.97, 58.69, 52.15, 51.85, 47.81, 47.73, 44.99, 37.88, 35.15, 34.56, 32.13, 32.06, 30.98, 29.61, 22.39, 22.28, 17.05, 16.61. HRMS (ESI,  $[M+H]^+$ ): Calcd. for  $C_{24}H_{34}N_3O_6^+$ , 460.2442. Found: 460.2464. Reverse-phase HPLC ( $CH_3CN$  100%, 215 nm):  $t_R$  7.30 min, >95% purity.

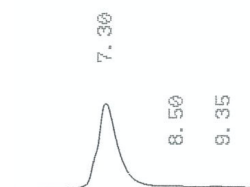



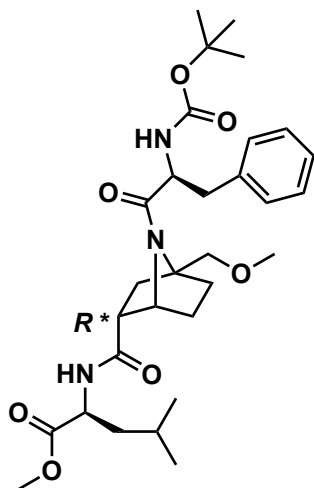

#### Boc-Phe-Abh(OMe)-Leu-OMe

To a solution of Boc-*R*-Abh(OMe)-Leu-OMe<sup>1</sup> (117 mg, 0.29 mmol) in CH<sub>2</sub>Cl<sub>2</sub> (1 mL) was added TFA (1.0 mL) at 0 °C. The reaction mixture was allowed to warm to room temperature, and stirred for 20 min. The reaction was then quenched with 2 M aqueous solution of NaOH. The resulting solution was extracted with EtOAc (3 times). The combined organic layer was dried over Na<sub>2</sub>SO<sub>4</sub>, and filtered. The solvent was evaporated to afford crude amine, which was used in the next reaction without further purification. To a solution of crude amine in CH<sub>2</sub>Cl<sub>2</sub> (2 mL) were added Boc-Phe-OH (117 mg, 0.44 mmol), CDMT (102 mg, 0.58 mmol), DMAP (2 mg) and NMM (96 µL, 0.87 mmol) at 0 °C. The reaction mixture was allowed to warm to room temperature, and stirred for 24 h. The reaction mixture was diluted with Et<sub>2</sub>O, washed with 1M aqueous solution of HCl and saturated aqueous solution of NaHCO<sub>3</sub>, and the organic layer was dried over Na<sub>2</sub>SO<sub>4</sub>. The solution was concentrated, and the residue was purified with column chromatography (Hexane/EtOAc = 2/1) to afford Boc-Phe-Abh(OMe)-Leu-OMe (68 mg, 42 %), as colorless oil.

<sup>1</sup>H NMR (CDCl<sub>3</sub>, 400MHz) δ 7.371-7.155 (5H, m), 6.255 (0.2H, brs), 5.608 (0.1H, brs), 5.459 (0.7H, brs), 5.385 (0.7H, d, J=6.48 Hz), 5.298 (0.3H, d, J=8.2 Hz), 4.573-4.553 (2H, m), 4.026-3.886 (3H, m), 3.758-3.710 (3H, m), 3.410 (3H, s), 3.119-2.900 (3H, m), 2.062-1.257 (9H, m), 1.443 (9H, s), 0.961-0.880 (6H, m). <sup>13</sup>C-NMR (100 MHz, CDCl<sub>3</sub>): 173.55, 173.47, 170.34, 170.23, 168.40, 167.36, 155.68, 155.21, 137.65, 136.82, 130.20, 129.82, 129.59, 129.53, 128.79, 128.49, 128.23, 127.50, 127.01, 126.62, 80.24, 79.94, 73.64, 69.37, 69.26, 62.85, 61.31, 59.38, 54.47, 52.43, 52.33, 50.86, 50.56, 45.81, 41.97, 41.41, 40.88, 36.19, 35.27, 33.16, 32.05, 28.45, 27.94, 24.96, 24.89, 22.95, 22.93, 21.89, 21.85. HRMS (ESI, [M+Na]<sup>+</sup>): Calcd. for C<sub>30</sub>H<sub>45</sub>N<sub>3</sub>NaO<sub>7</sub><sup>+</sup>, 582.3150. Found: 582.3152.

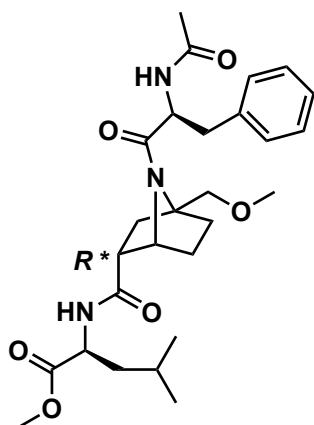

#### Ac-Phe-Abh(OMe)-Leu-OMe

To a solution of Boc-Phe-Abh(OMe)-Leu-OMe (20 mg, 0.04 mmol) in  $\text{CH}_2\text{Cl}_2$  (1 mL) was added TFA (1.0 mL) at 0 °C. The reaction mixture was allowed to warm to room temperature, and stirred for 20 min. The solvent was evaporated to afford crude amine, which was used in the next reaction without further purification. To a solution of crude amine in  $\text{CH}_2\text{Cl}_2$  (1 mL) was added  $\text{Ac}_2\text{O}$  (19  $\mu\text{L}$ , 0.2 mmol) and  $\text{Et}_3\text{N}$  (17  $\mu\text{L}$ , 0.12 mmol) at 0 °C. The reaction mixture was allowed to warm to room temperature, and stirred for overnight. The solution was concentrated, and the residue was purified with column chromatography ( $\text{EtOAc/MeOH} = 20/1$ ) to afford Ac-Phe-Abh(OMe)-Leu-OMe (16 mg, 89%) as a colorless oil.

$^1\text{H-NMR}$  (400 MHz,  $\text{CDCl}_3$ )  $\delta$  7.379-7.192 (5H, m), 6.581 (0.3H, d,  $J=6.12$  Hz), 6.514 (0.7H, d,  $J=7.08$  Hz), 6.428 (0.3H, d,  $J=5.28$  Hz), 5.411 (0.7H, d,  $J=8.0$  Hz), 4.935-4.853 (1H, m), 4.580-4.529 (1H, m), 4.349 (0.3H, brs), 4.008 (2H, s), 3.902 (0.7H, s), 3.760-3.710 (3H, m), 3.417-3.411 (3H, m), 3.138-2.897 (3H, m), 2.016-1.253 (11H, m), 0.967-0.914 (7H, m).  $^{13}\text{C-NMR}$  (100 MHz,  $\text{CDCl}_3$ ): 173.78, 173.62, 170.44, 170.36, 170.17, 169.69, 169.02, 167.02, 137.39, 136.20, 130.27, 129.64, 129.52, 128.91, 128.69, 128.64, 127.72, 127.28, 127.25, 127.22, 73.59, 73.40, 72.88, 70.76, 69.68, 69.60, 69.48, 61.38, 59.60, 59.41, 53.44, 53.27, 52.48, 52.42, 52.37, 50.94, 50.64, 45.73, 44.94, 42.02, 41.37, 40.62, 39.49, 35.29, 33.13, 31.87, 31.40, 25.11, 25.03, 24.96, 23.45, 23.34, 23.06, 22.98. HRMS (ESI,  $[\text{M}+\text{Na}]^+$ ): Calcd. for  $\text{C}_{27}\text{H}_{39}\text{N}_3\text{NaO}_6^+$ , 524.2731. Found: 524.2733. Reverse-phase HPLC ( $\text{CH}_3\text{CN}$  100%, 215 nm):  $t_R$  8.19 min, >95% purity.

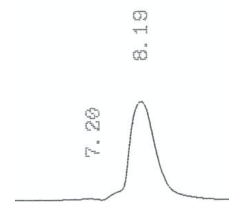

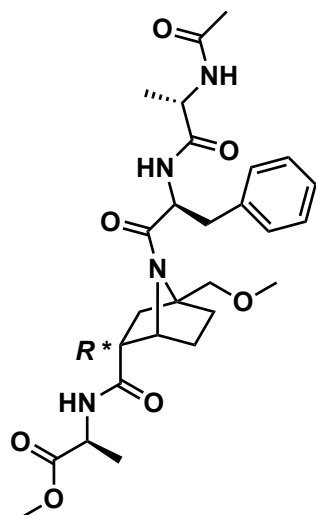

#### Ac-Ala-Phe-Abh(OMe)-Ala-OMe

To a solution of Boc-Phe-Abh(OMe)-Ala-OMe (10 mg, 0.02 mmol) in  $\text{CH}_2\text{Cl}_2$  (1 mL) was added TFA (1.0 mL) at 0 °C. The reaction mixture was allowed to warm to room temperature, and stirred for 20 min. The reaction was then quenched with 2 M aqueous solution of NaOH. The resulting solution was extracted with EtOAc (3 times). The combined organic layer was dried over  $\text{Na}_2\text{SO}_4$ , and filtered. The solvent was evaporated to afford crude amine, which was used in the next reaction without further purification. To a solution of crude amine in  $\text{CH}_2\text{Cl}_2$  (1 mL) were added Ac-Ala-OH (4 mg, 0.03 mmol), CDMT (7 mg, 0.04 mmol), DMAP (1 mg) and NMM (11  $\mu\text{L}$ , 0.1 mmol) at 0 °C. The reaction mixture was allowed to warm to room temperature, and stirred for 24 h. The reaction mixture was diluted with  $\text{Et}_2\text{O}$ , washed with 1M aqueous solution of HCl and saturated aqueous solution of  $\text{NaHCO}_3$ , and the organic layer was dried over  $\text{Na}_2\text{SO}_4$ . The solution was concentrated, and the residue was purified with column chromatography ( $\text{EtOAc/MeOH} = 20/1.5$ ) to afford Ac-Ala-Phe-Abh(OMe)-Ala-OMe (9 mg, 85 %), as colorless oil.

$^1\text{H}$ -NMR (400 MHz,  $\text{CD}_3\text{OD}$ )  $\delta$  7.315-7.234 (5H, m), 4.596 (1H, s), 4.539 (1H, brs), 4.391-4.287 (2H, m), 4.025-3.954 (2H, m), 3.722 (3H, s), 3.383 (3H, s), 3.081-2.955 (2H, m), 2.083-2.066 (1H, m), 1.962 (3H, s), 1.946-1.571 (6H, m), 1.371 (3H, d,  $J=7.28\text{Hz}$ ), 1.277 (3H, d,  $J=7.2\text{Hz}$ ).  $^{13}\text{C}$ -NMR(100 MHz,  $\text{CD}_3\text{OD}$ ): 174.68, 174.61, 173.16, 172.90, 169.25, 138.10, 130.87, 129.53, 128.03, 75.16, 70.41, 69.61, 62.08, 59.52, 56.05, 54.43, 52.75, 50.29, 46.67, 39.34, 36.19, 33.01, 29.53, 17.80, 17.38. HRMS (ESI,  $[\text{M}+\text{Na}]^+$ ): Calcd. for  $\text{C}_{27}\text{H}_{38}\text{N}_4\text{NaO}_7^+$ , 553.2633. Found: 553.2639. Reverse-phase HPLC ( $\text{CH}_3\text{CN}$  100%, 215 nm):  $t_R$  6.88 min, >95% purity.

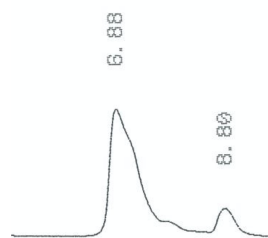

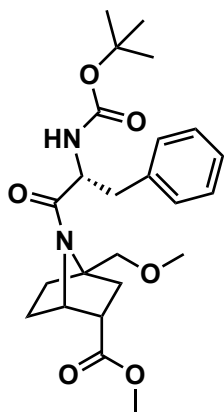

**Boc-*D*-Phe-*S*-Abh(OMe)-OMe**

To a solution of 22*S* (81 mg, 0.27 mmol) in CH<sub>2</sub>Cl<sub>2</sub> (1 mL) was added TFA (1.0 mL) at 0 °C. The reaction mixture was allowed to warm to room temperature, and stirred for 20 min. The solvent was evaporated to afford crude amine, which was used in the next reaction without further purification. To a solution of crude amine in CH<sub>2</sub>Cl<sub>2</sub> (2 mL) were added Boc-*D*-Phe-OH (108 mg, 0.4 mmol), CDMT (95 mg, 0.54 mmol), DMAP (2 mg) and NMM (148 µl, 1.35 mmol) at 0 °C. The reaction mixture was allowed to warm to room temperature, and stirred for 12 h. The reaction mixture was diluted with Et<sub>2</sub>O, washed with 1M aqueous solution of HCl and saturated aqueous solution of NaHCO<sub>3</sub>, and the organic layer was dried over Na<sub>2</sub>SO<sub>4</sub>. The solution was concentrated, and the residue was purified with column chromatography (Hexane/EtOAc = 3/1-2/1) to afford Boc-*D*-Phe-*S*-Abh(OMe)-OMe (54 mg, 45 %), as colorless oil.

<sup>1</sup>H NMR (CDCl<sub>3</sub>, 400MHz) δ 7.270-7.190 (5H, m), 5.276 (1H, d, J=8.8Hz), 4.590-4.532 (1H, m), 4.281 (1H, brs), 4.017-4.012 (2H, m), 3.639 (3H, d), 3.401 (3H, s), 3.015-2.903 (3H, m), 1.895-1.249 (6H, m), 1.409 (9H, s). <sup>13</sup>C-NMR (100 MHz, CDCl<sub>3</sub>): 172.36, 168.08, 155.17, 136.85, 129.73, 128.59, 127.04, 79.83, 74.09, 68.96, 59.43, 55.44, 54.10, 52.04, 51.98, 44.71, 40.43, 35.87, 31.68, 28.42. HRMS (ESI, [M+Na]<sup>+</sup>): Calcd. for C<sub>24</sub>H<sub>34</sub>N<sub>2</sub>NaO<sub>6</sub><sup>+</sup>, 469.2309. Found: 469.2317.

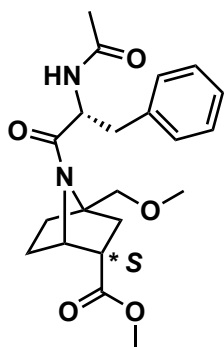

**Ac-*D*-Phe-*S*-Abh(OMe)-OMe**

To a solution of Boc-*D*-Phe-*S*-Abh(OMe)-OMe (54 mg, 0.04 mmol) in CH<sub>2</sub>Cl<sub>2</sub> (1 mL) was added TFA (1.0 mL) at 0 °C. The reaction mixture was allowed to warm to room temperature, and stirred for 20 min. The solvent was evaporated to afford crude amine, which was used in the next reaction without further purification. To a solution of

crude amine in CH<sub>2</sub>Cl<sub>2</sub> (2 mL) was added Ac<sub>2</sub>O (75  $\mu$ l, 0.6 mmol) and Et<sub>3</sub>N (50  $\mu$ l, 0.36 mmol) at 0 °C. The reaction mixture was allowed to warm to room temperature, and stirred for overnight. The solution was concentrated, and the residue was purified with column chromatography (EtOAc/MeOH = 20/1) to afford Ac-*D*-Phe-*S*-Abh(OMe)-OMe (41 mg, 89%) as a colorless oil.

<sup>1</sup>H-NMR (400 MHz, CDCl<sub>3</sub>)  $\delta$  7.287-7.187 (5H, m), 6.467 (1H, brs), 4.922-4.844 (1H, m), 4.301 (1H, brs), 4.046-4.025 (2H, m), 3.655 (3H, d), 3.424 (3H, s), 3.042-2.942 (3H, m), 2.174-1.585 (6H, m), 1.978 (3H, s). <sup>13</sup>C-NMR(100 MHz, CDCl<sub>3</sub>): 172.27, 169.70, 167.63, 136.54, 129.74, 128.66, 127.21, 73.70, 69.18, 60.36, 59.46, 53.95, 52.84, 52.05, 44.62, 39.96, 35.80, 31.68, 26.27. HRMS (ESI, [M+Na]<sup>+</sup>): Calcd. for C<sub>21</sub>H<sub>28</sub>N<sub>2</sub>NaO<sub>5</sub><sup>+</sup>, 411.1890. Found: 411.1894.

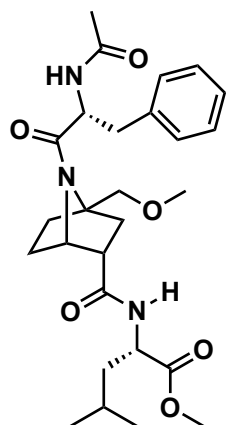

#### Ac-*D*-Phe-*S*-Abh(OMe)-Leu-OMe

To a solution of Ac-*D*-Phe-*S*-Abh(OMe)-OMe (41 mg, 0.11 mmol) in THF (2 mL) was added a solution of LiOH.H<sub>2</sub>O (9 mg, 0.21 mmol) in H<sub>2</sub>O (1 mL) at rt. MeOH (0.5 mL) was added to the reaction mixture and the mixture was stirred for 12 h at rt. The reaction mixture was poured into 5% aqueous solution of KHSO<sub>4</sub>, and the whole was extracted with CHCl<sub>3</sub> ( $\times$ 3 times). The combined organic phase was washed with brine, dried over Na<sub>2</sub>SO<sub>4</sub>, and the solvent was evaporated. Compound Ac-*D*-Phe-*S*-Abh(OMe)-OH (40 mg, 100%) was afforded, which was used in the next reaction without further purification.

To a solution of crude carboxyl acid in CH<sub>2</sub>Cl<sub>2</sub> (2 mL) were added NH<sub>2</sub>-Leu-OMe.HCl (29 mg, 0.16), CDMT (37 mg, 0.21 mmol), DMAP (2 mg) and NMM (58  $\mu$ l, 0.53 mmol) at 0 °C. The reaction mixture was allowed to warm to room temperature, and stirred for 24 h. The reaction mixture was diluted with Et<sub>2</sub>O, washed with 1M aqueous solution of HCl and saturated aqueous solution of NaHCO<sub>3</sub>, and the organic layer was dried over Na<sub>2</sub>SO<sub>4</sub>. The solution was concentrated, and the residue was purified with column chromatography (EtOAc:MeOH=20:1) to afford Ac-*D*-Phe-*S*-Abh(OMe)-Leu-OMe (42 mg (fold conformation 39 mg and unfold conformation 3mg), 80 %), as a colorless oil.

Fold conformation: <sup>1</sup>H-NMR (400 MHz, DMSO)  $\delta$  8.269 (1H, d, J=7.2Hz), 8.119 (1H, d, J=5.6Hz), 7.269-7.175 (5H, m), 4.800-4.782 (1H, m), 4.739 (1H, brs), 4.260-4.203 (1H, m), 3.977-3.876 (2H, m), 3.609 (3H, s), 3.282 (3H, s), 2.934-2.778 (2H, m), 2.149 (1H, brs), 1.885-1.356 (9H, m), 1.844 (3H, s), 0.889 (6H, dd, <sup>1</sup>J=26.8Hz,

$^2J=6.4\text{Hz}$ ).  $^{13}\text{C}$ -NMR (100 MHz, DMSO): 173.02, 170.43, 168.70, 167.72, 137.31, 129.62, 127.92, 126.31, 74.07, 68.46, 68.09, 59.71, 58.61, 52.09, 51.71, 50.49, 44.83, 38.09, 35.10, 31.93, 24.87, 24.29, 22.75, 22.24, 21.12. HRMS (ESI,  $[\text{M}+\text{Na}]^+$ ): Calcd. for  $\text{C}_{27}\text{H}_{39}\text{N}_3\text{NaO}_6^+$ , 524.2731. Found: 524.2742. Reverse-phase HPLC ( $\text{CH}_3\text{CN}$  100%, 256 nm):  $t_R$  7.83 min, 91% purity.

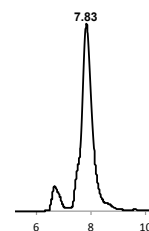

Unfold conformation:  $^1\text{H}$ -NMR (400 MHz, DMSO)  $\delta$  8.256 (1H, d,  $J=6.8\text{Hz}$ ), (1H, d,  $J=7.6\text{Hz}$ ), 7.310-7.197 (5H, m), 4.734-4.679 (1H, m), 4.557 (1H, brs), 4.257-4.202 (1H, m), 3.992-3.866 (2H, m), 3.600 (3H, s), 3.297 (3H, s), 2.980 (1H, brs), 2.897-2.789 (2H, m), 1.984-1.365 (9H, m), 1.819 (3H, s), 0.874 (6H, dd,  $^1J=19.2\text{Hz}$ ,  $^2J=6.4\text{Hz}$ ). HRMS (ESI,  $[\text{M}+\text{Na}]^+$ ): Calcd. for  $\text{C}_{27}\text{H}_{39}\text{N}_3\text{NaO}_6^+$ , 524.2731. Found: 524.2745. Reverse-phase HPLC ( $\text{CH}_3\text{CN}$  100%, 256 nm):  $t_R$  6.85 min, >95% purity.

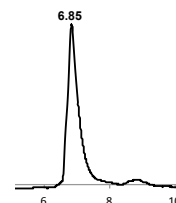

#### 4. $^1\text{H}$ and $^{13}\text{C}$ -NMR charts of synthesized compounds

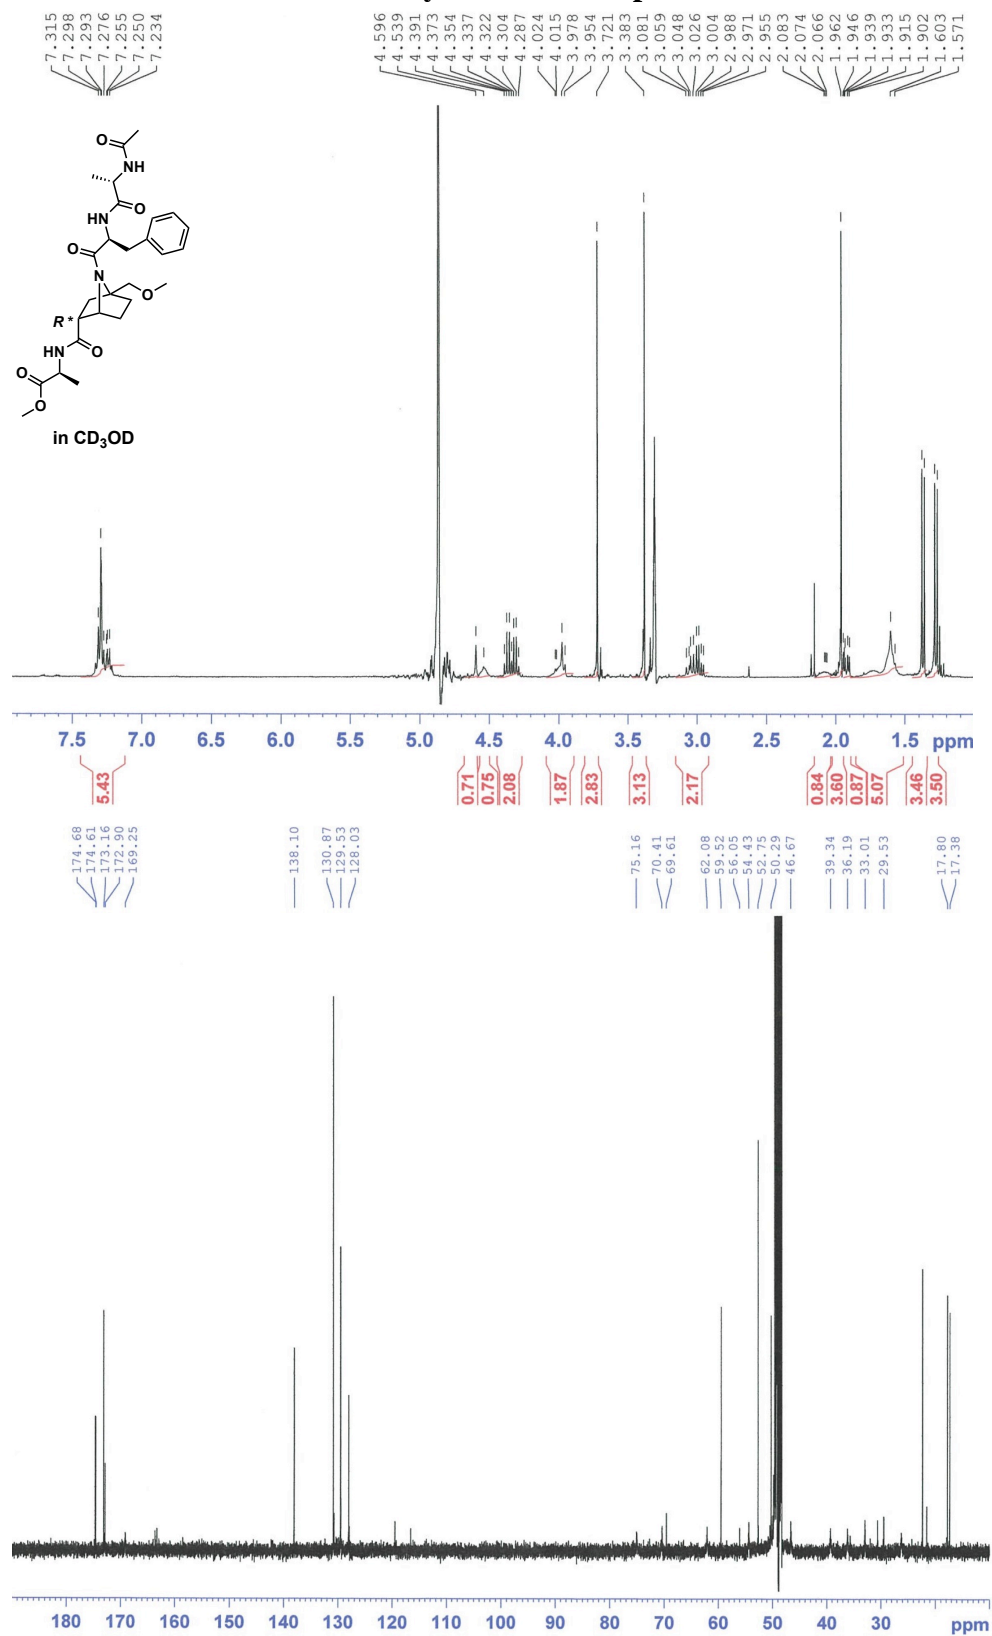

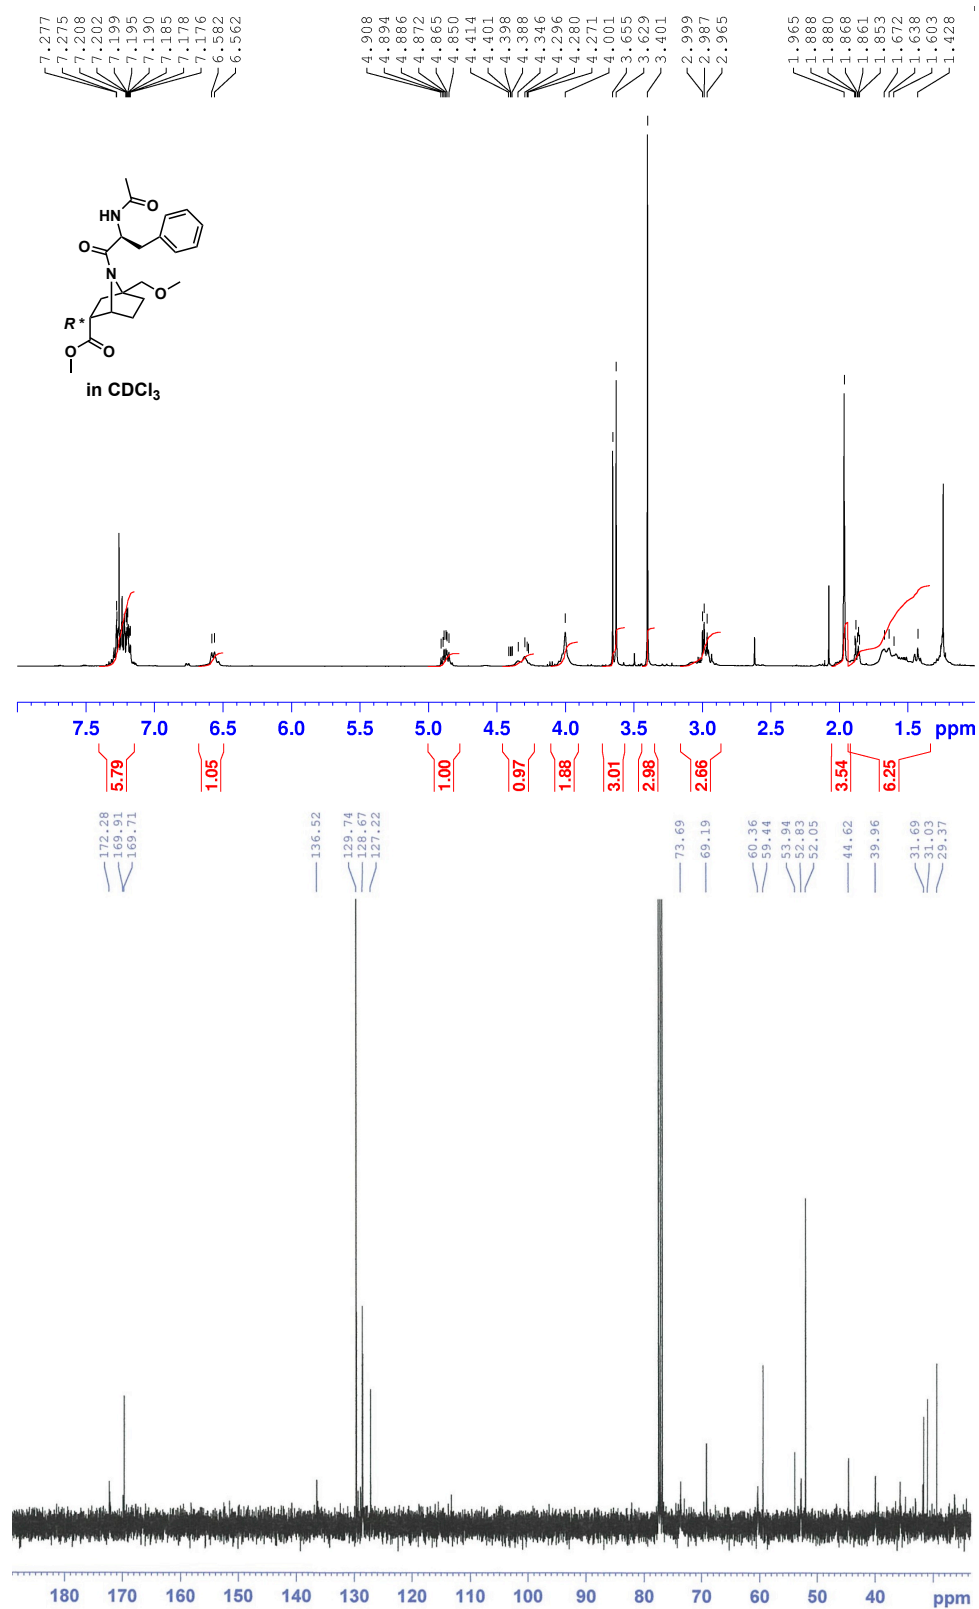



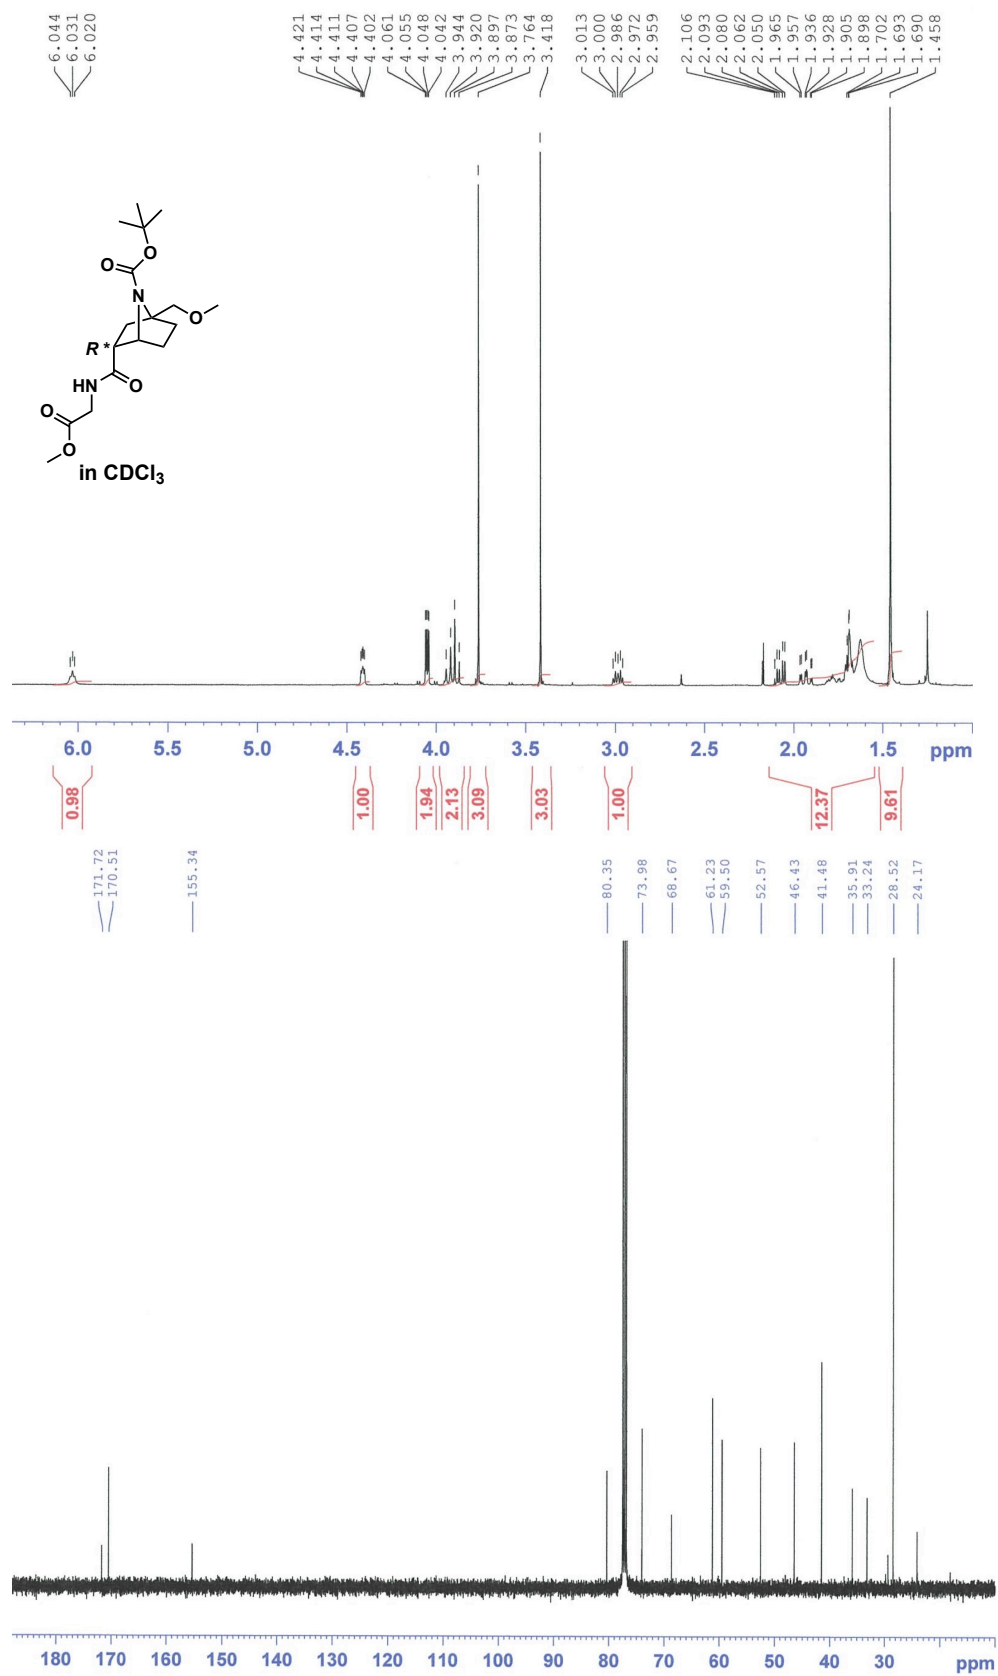

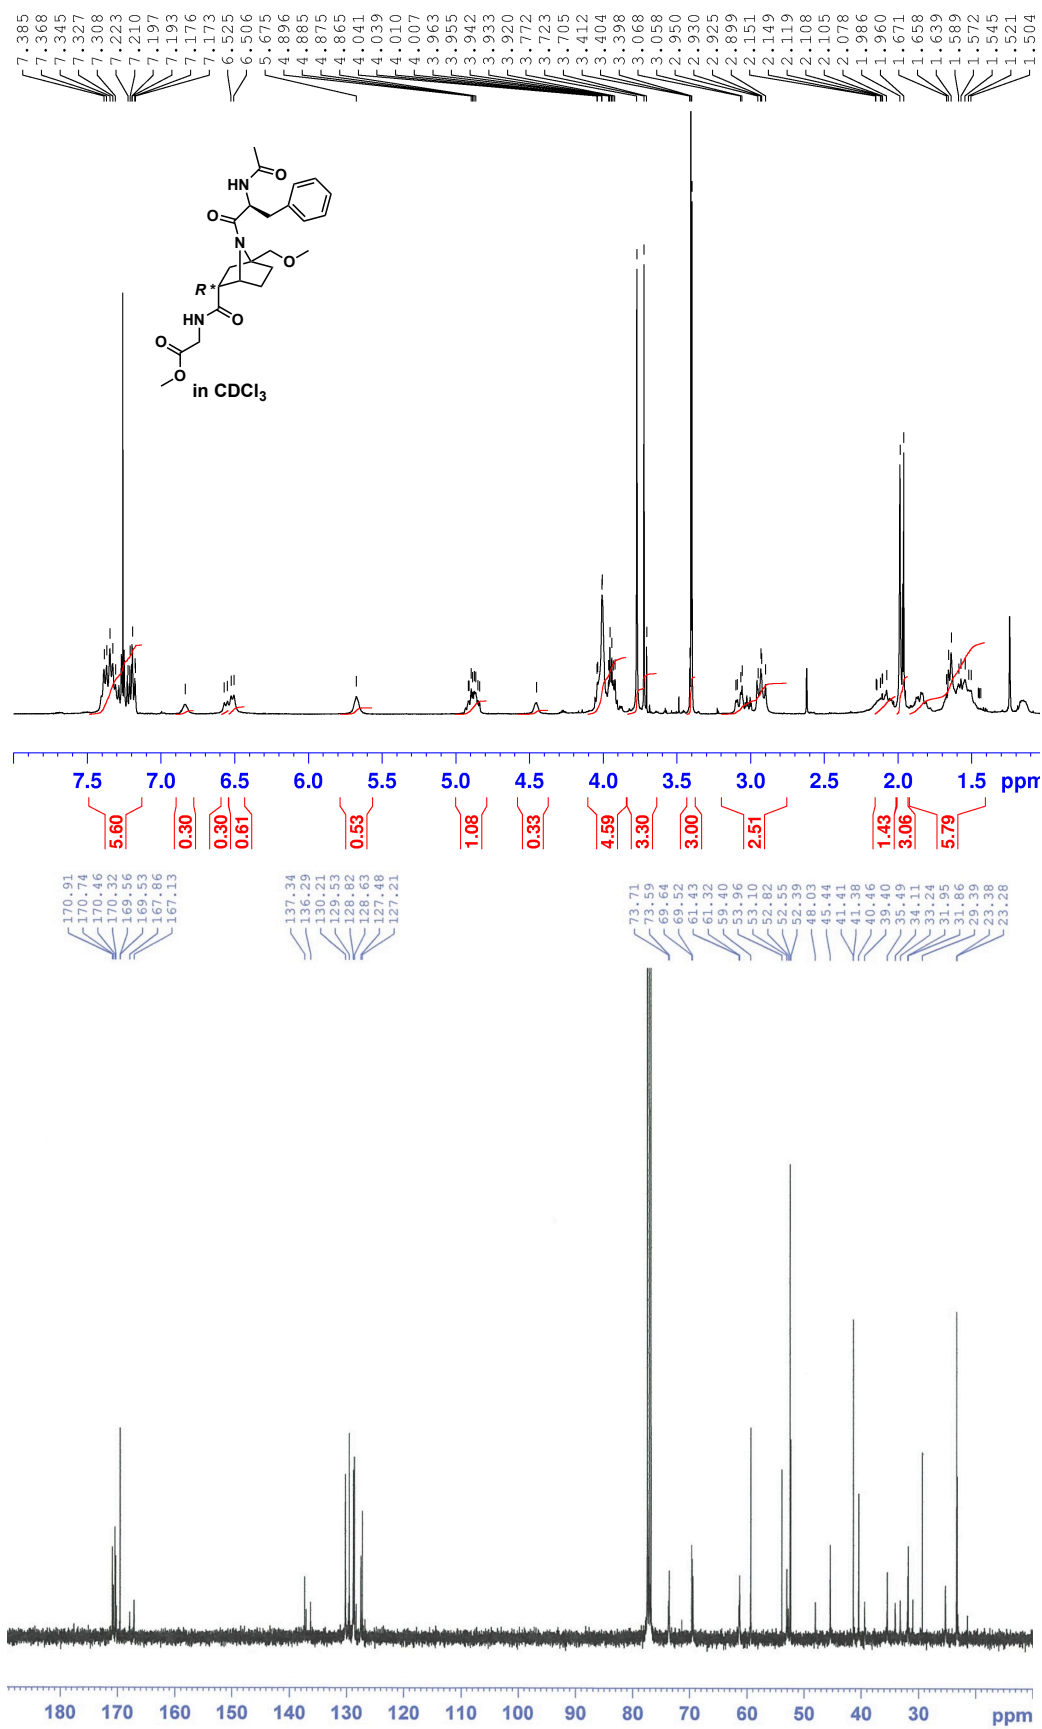

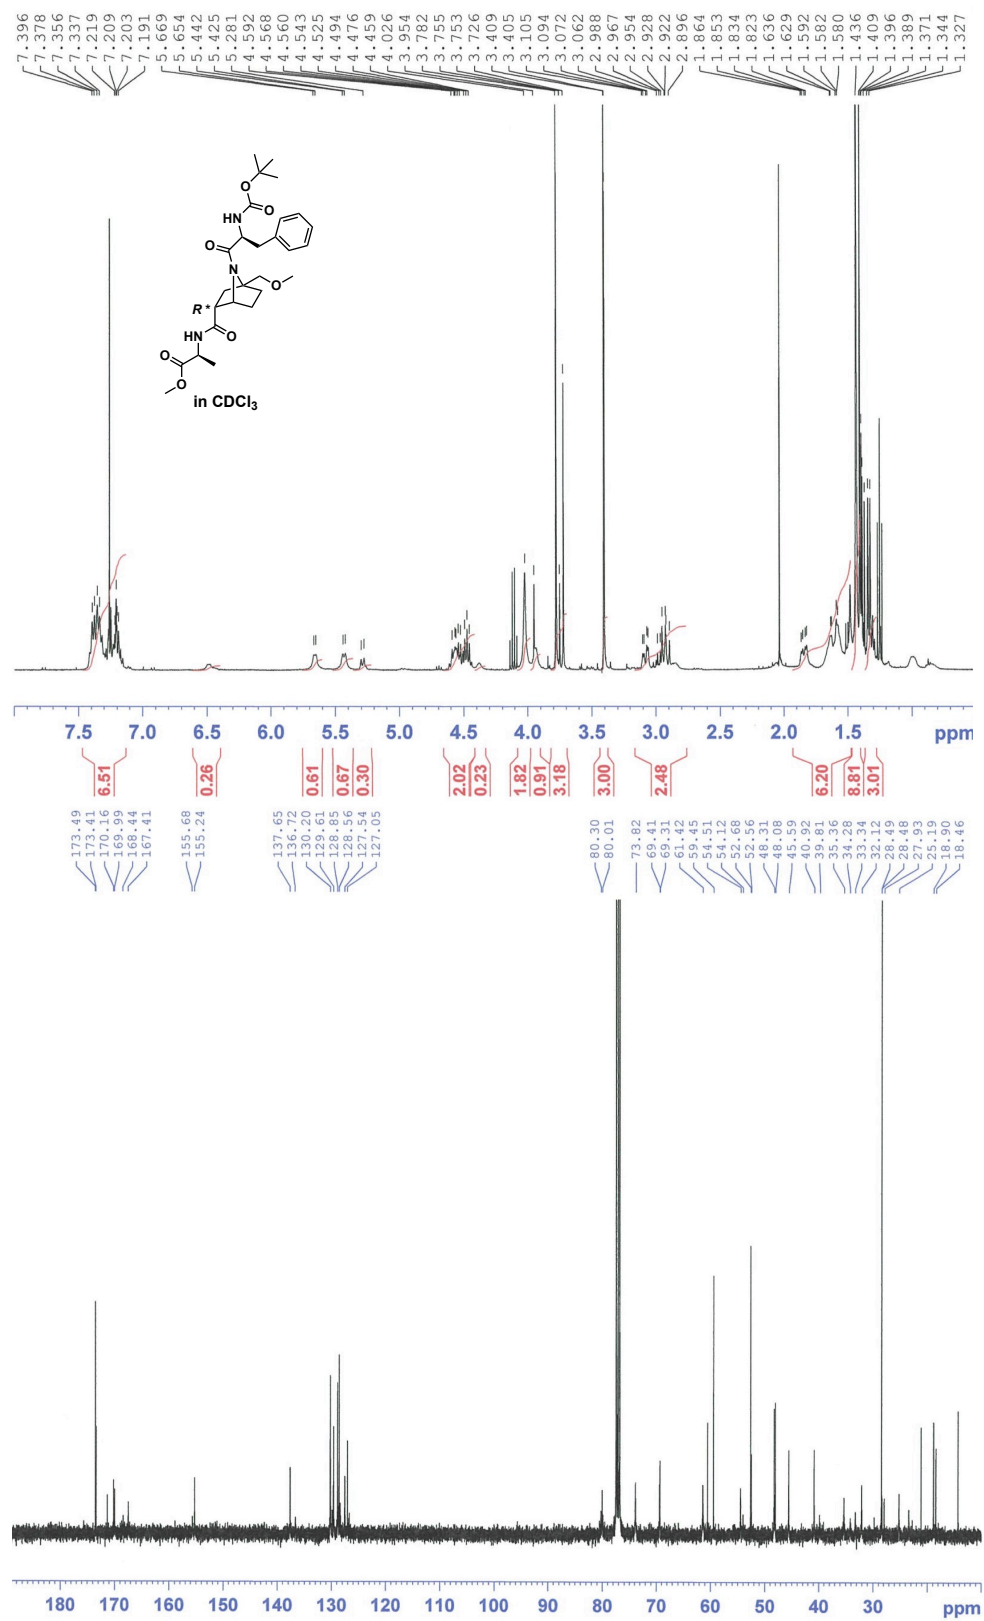

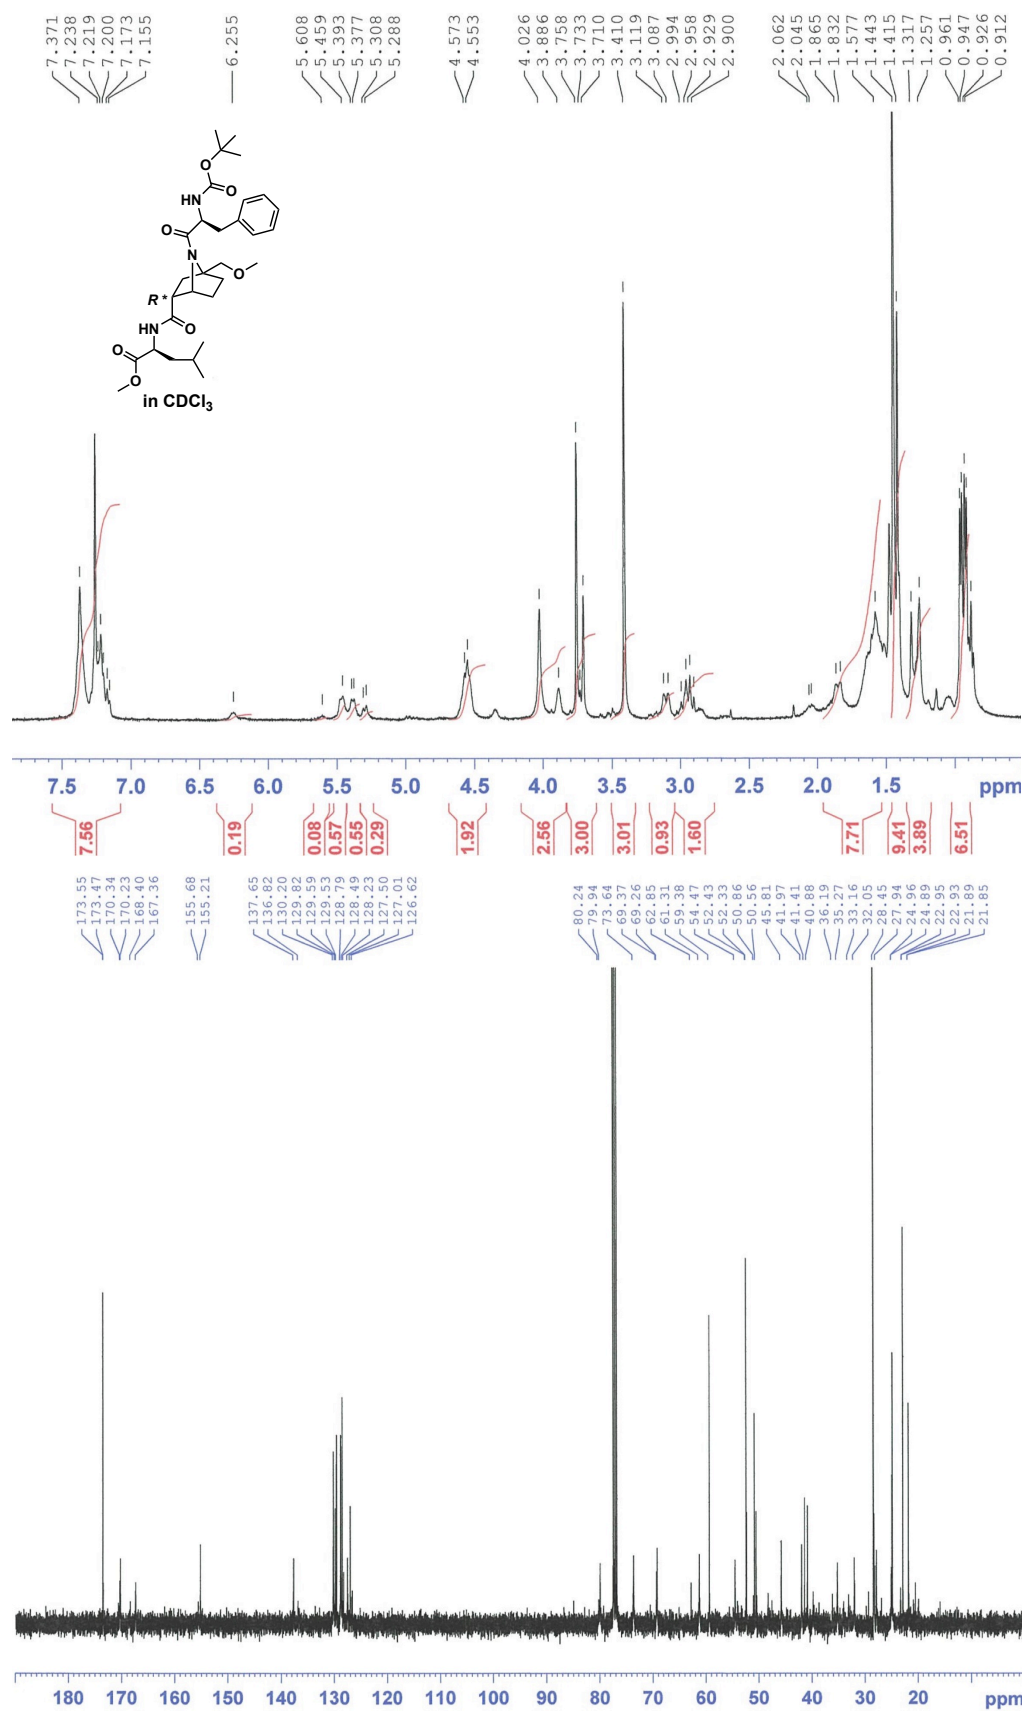

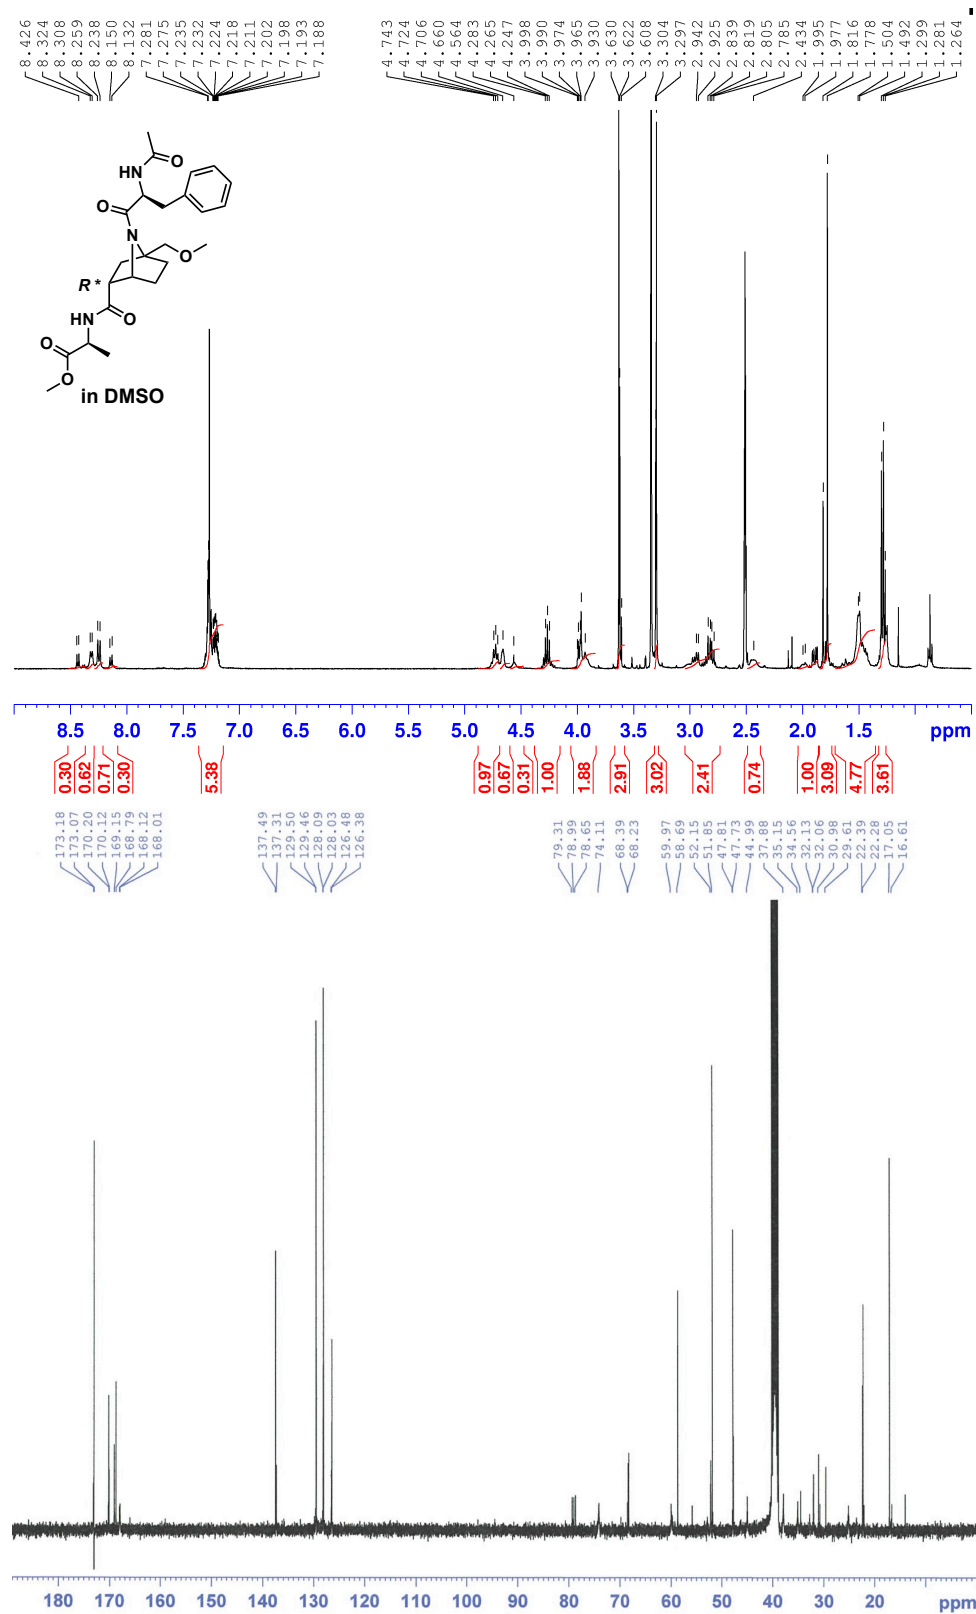

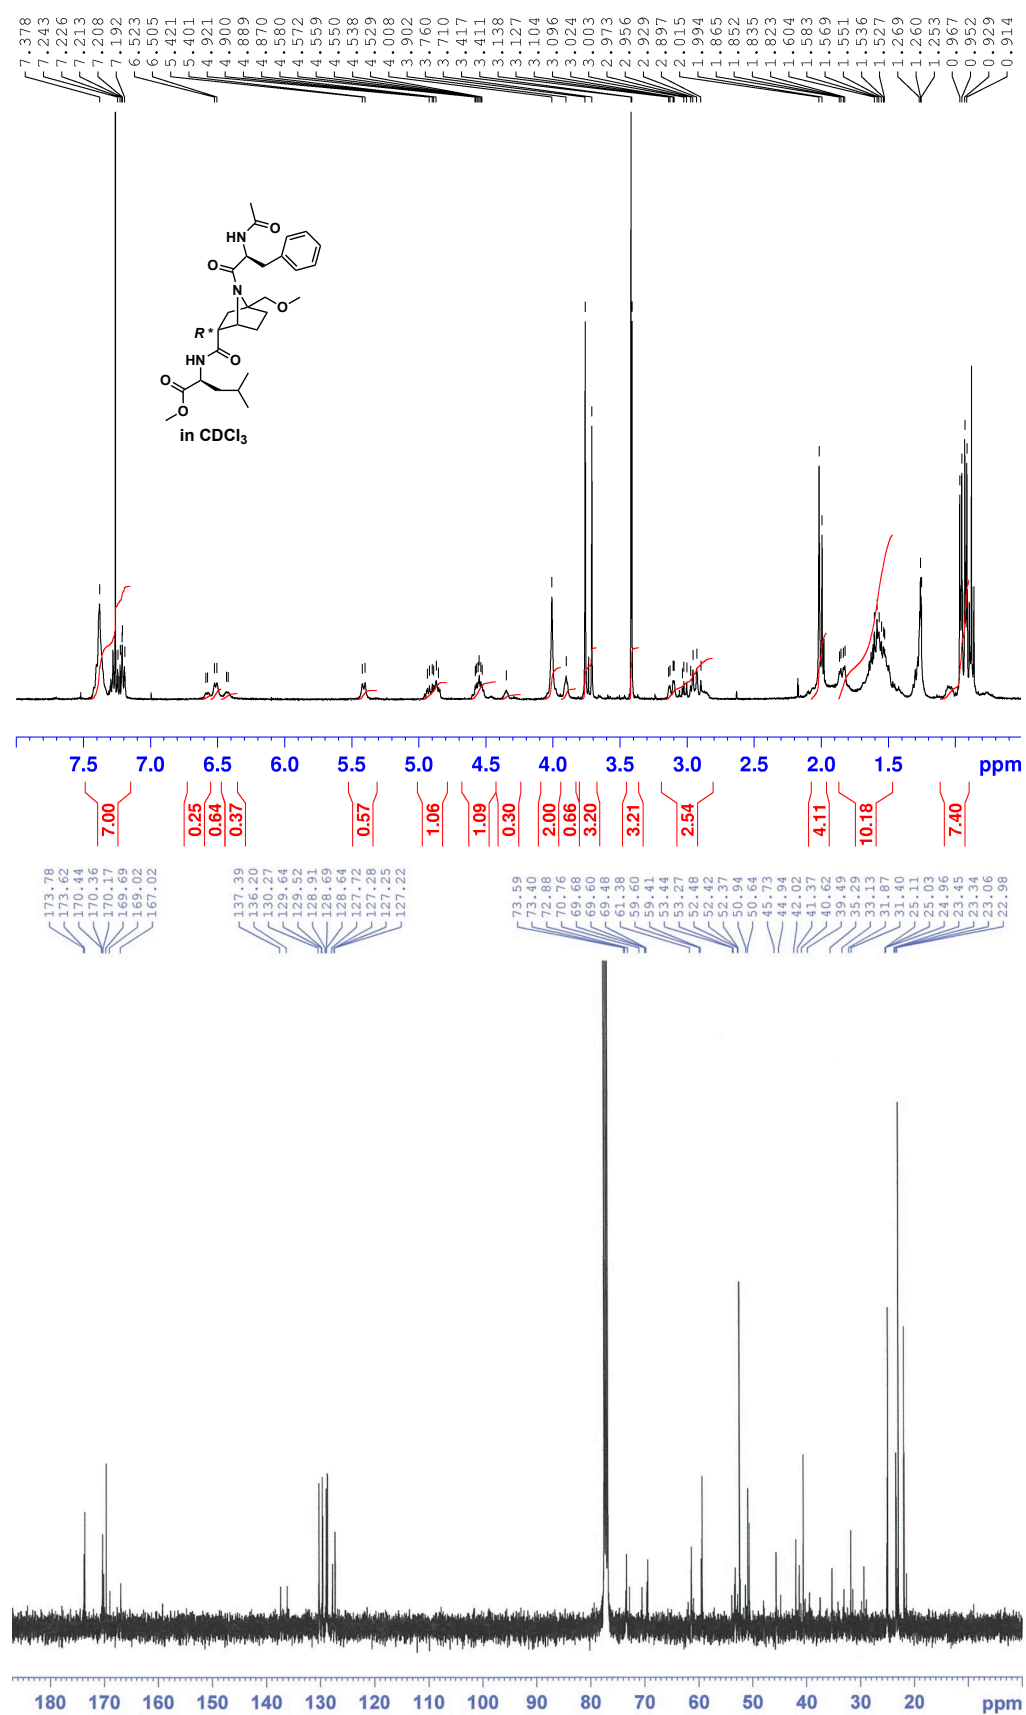

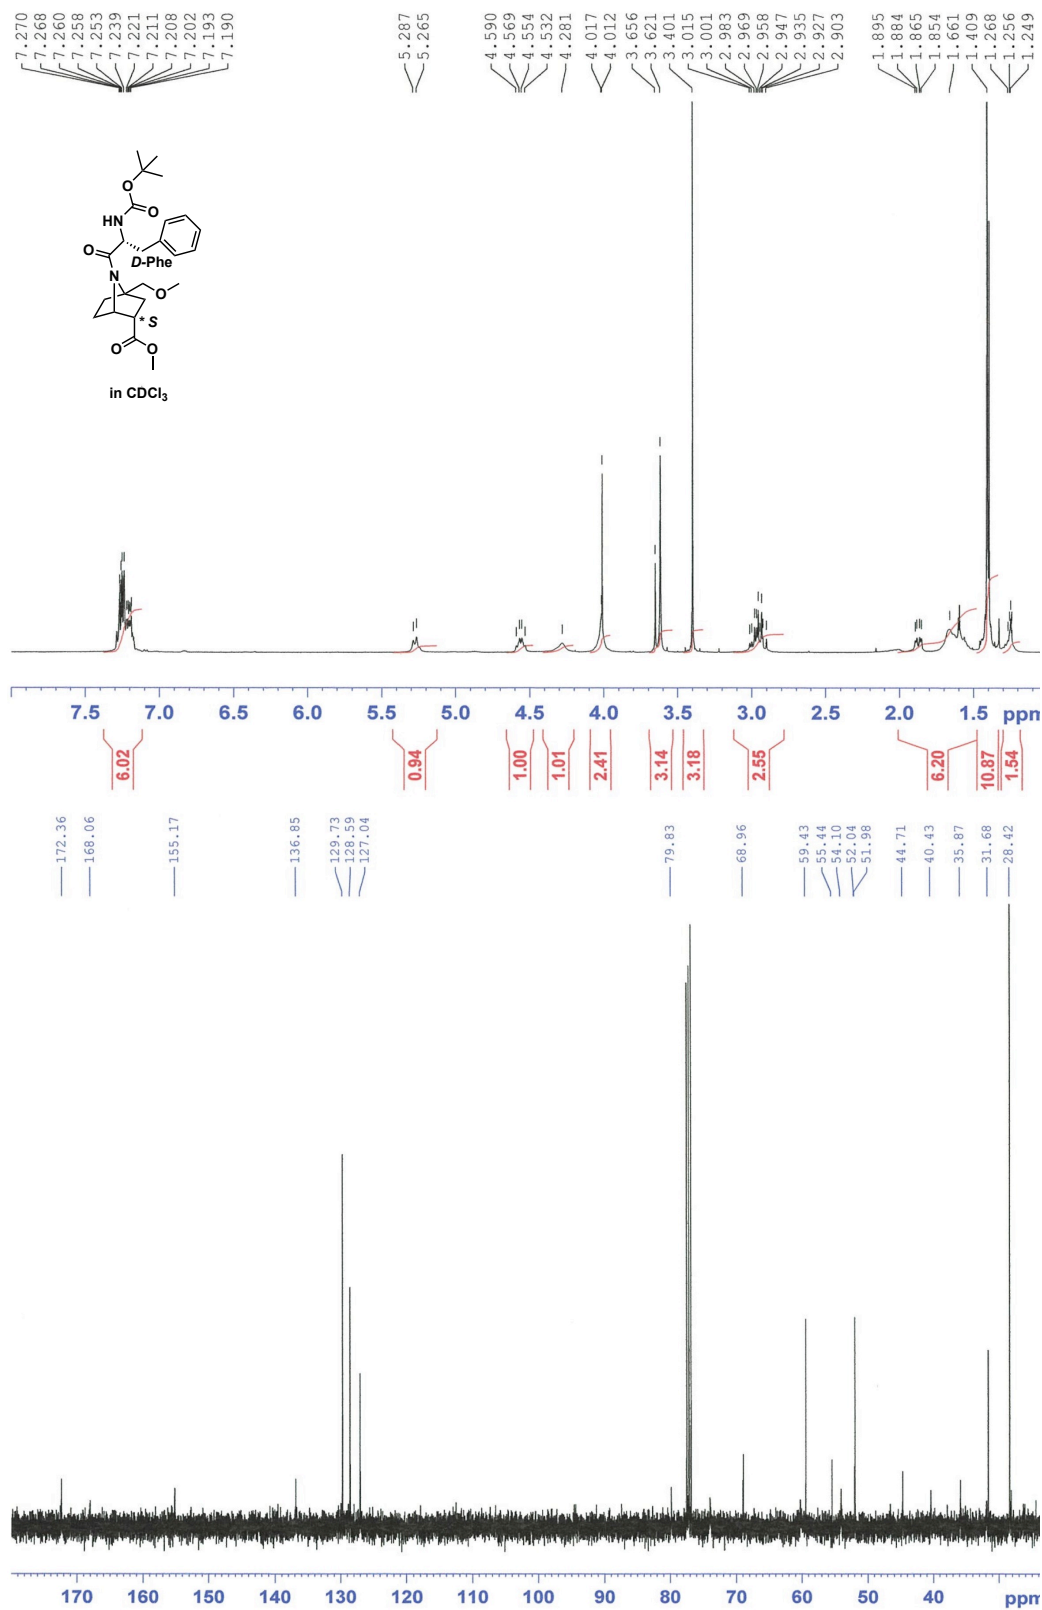

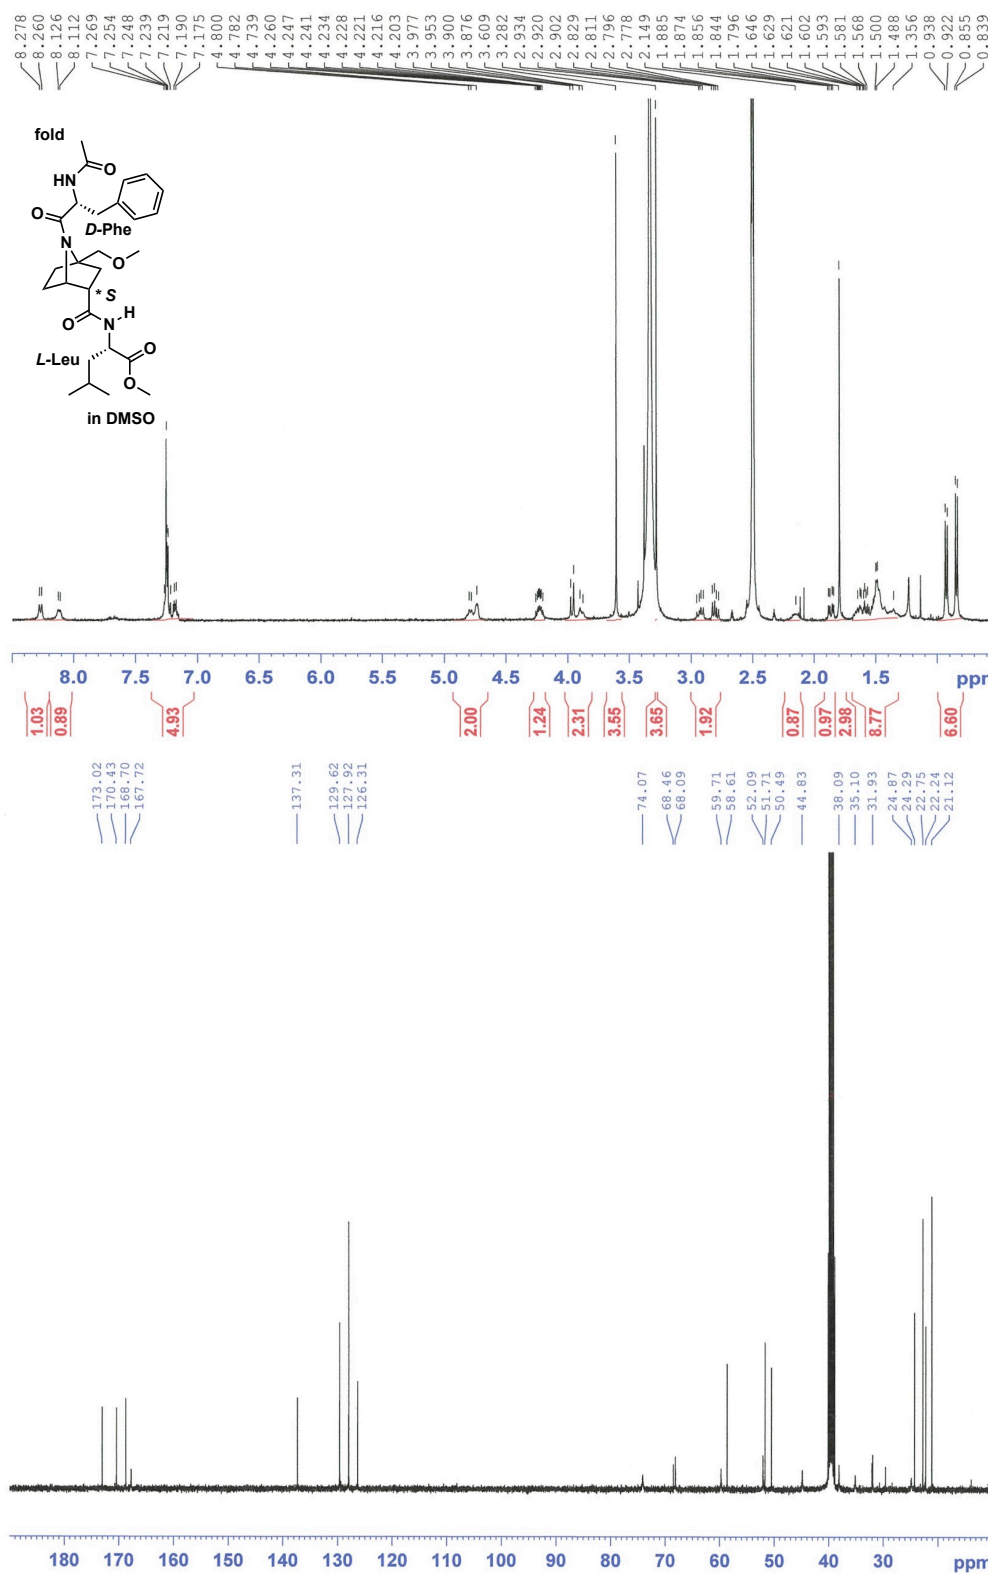



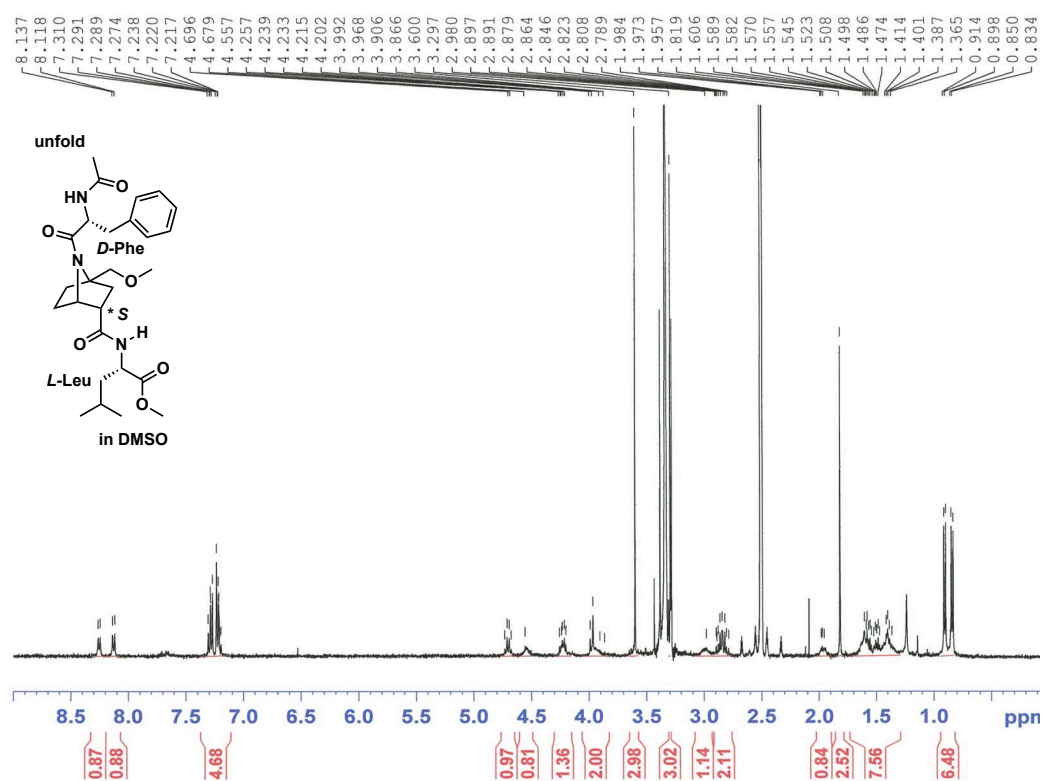

## 5. Circular Dichroism

The CD spectra were obtained in a 1mm path length quartz cell with scanning speed of 100nm/min and scan range of 190-300nm. The values are expressed in terms of  $[\theta]$  the total molar ellipticity ( $\text{deg.cm}^2.\text{dmol}^{-1}$ ).

## 6. FTIR measurements

Attenuated total reflection (ATR)-FTIR measurements were carried out for peptides at room temperature on a Perkin-Elmer Spectrum 100 Fourier-transform infrared spectrometer equipped with an ATR unit and an MCT detector at  $2\text{ cm}^{-1}$  resolution. Dry air gas was constantly pumped into the ATR unit of the spectrometer to suppress water vapor. Approximately 0.020 ml of a sample in  $\text{CHCl}_3$  solution was placed on a Diamond/ZnSe 1-reflection top-plate (Perkin-Elmer). To suppress the evaporation of the solvent as much as possible, a cover glass covered on the drop of sample. We checked the evaporation of  $\text{CHCl}_3$  solvent by monitoring the intensity of  $741\text{ cm}^{-1}$  due to C-Cl stretching mode. Interferograms from 30 scans were averaged to obtain one spectrum for the series of measurements of samples in solution. Interferograms from 200 scans were averaged to obtain one spectrum for the series of measurements of samples in dry film, after the solvent has completely evaporated. The treatment and analyses of ATR-FTIR spectra have been performed by using Igor Pro 6.3 (WaveMetrix Lake Oswago) as described previously.<sup>2</sup>

## 7. Calculations

### Molecular dynamics

The Molecular dynamics calculation we used in this work is Desmond molecular dynamics with OPLS3 force field. The cubic solvent model is built in DMSO. The box size calculation method is buffer. The distance of the solvent box is  $10\text{ \AA}$  each and the angle is  $90^\circ$  each. The ensemble class is NPT. The total simulation time is 100 ns and the trajectory of recording interval is 30 ps. The approximate number of frames is 3333 and the temperature is set to 298K. Thermostat method is Nose-Hoover chain. Relaxation time is 2ps and coupling style is isotropic.

### DFT calculations

8-fold : M06-2x/6-31G(d), scrf=(smd, solvent=DMSO)

NIMG=1 ( $3.7654\text{ cm}^{-1}$ )

Zero-point correction=

0.648088 (Hartree/Particle)

Thermal correction to Energy=

0.687569

Thermal correction to Enthalpy= 0.688513  
 Thermal correction to Gibbs Free Energy= 0.568648  
 Sum of electronic and zero-point Energies= -1796.055021  
 Sum of electronic and thermal Energies= -1796.015540  
 Sum of electronic and thermal Enthalpies= -1796.014596  
 Sum of electronic and thermal Free Energies= -1796.134461

Standard orientation:

| Center<br>Number | Atomic<br>Number | Atomic<br>Type | Coordinates (Angstroms) |           |           |
|------------------|------------------|----------------|-------------------------|-----------|-----------|
|                  |                  |                | X                       | Y         | Z         |
| 1                | 7                | 0              | 3.382719                | -1.668009 | -0.015042 |
| 2                | 6                | 0              | 4.305815                | -2.756825 | 0.033893  |
| 3                | 6                | 0              | 5.739978                | -2.220671 | -0.403890 |
| 4                | 8                | 0              | 5.962775                | -1.038891 | -0.841321 |
| 5                | 6                | 0              | 3.782214                | -3.935602 | -0.792142 |
| 6                | 1                | 0              | 4.350268                | -3.140143 | 1.053289  |
| 7                | 6                | 0              | -0.016940               | -0.997202 | 2.199669  |
| 8                | 6                | 0              | 0.333431                | -0.452981 | 0.721409  |
| 9                | 6                | 0              | 0.313341                | 1.374120  | 2.004689  |
| 10               | 6                | 0              | 0.000162                | 0.300172  | 2.988874  |
| 11               | 1                | 0              | -0.986406               | -1.490885 | 2.266518  |
| 12               | 1                | 0              | 0.024931                | -1.123561 | -0.080530 |
| 13               | 1                | 0              | -0.920108               | 0.439445  | 3.556286  |
| 14               | 1                | 0              | 0.737034                | 0.155082  | 3.778814  |
| 15               | 6                | 0              | 1.785460                | 1.353553  | 1.512509  |
| 16               | 1                | 0              | 2.434219                | 1.244492  | 2.381585  |
| 17               | 1                | 0              | 2.119184                | 2.322789  | 1.141955  |
| 18               | 6                | 0              | 1.838302                | 0.091730  | 0.637304  |
| 19               | 1                | 0              | 2.064389                | 0.335511  | -0.400736 |
| 20               | 7                | 0              | -0.316944               | 0.853765  | 0.796748  |
| 21               | 6                | 0              | -0.148327               | 2.775605  | 2.427043  |
| 22               | 1                | 0              | -0.091083               | 3.497987  | 1.612722  |
| 23               | 1                | 0              | -1.203131               | 2.846794  | 2.692484  |
| 24               | 8                | 0              | 0.798867                | 3.195587  | 3.436516  |
| 25               | 1                | 0              | 0.788295                | -1.671381 | 2.491746  |
| 26               | 7                | 0              | -3.287198               | 0.378279  | -1.078336 |
| 27               | 6                | 0              | -1.829179               | 0.618451  | -1.230970 |
| 28               | 6                | 0              | -1.331479               | 1.297387  | 0.035493  |
| 29               | 8                | 0              | -2.036008               | 2.240511  | 0.435205  |
| 30               | 6                | 0              | -1.681833               | 1.646864  | -2.350828 |
| 31               | 1                | 0              | -3.895156               | 1.100201  | -1.438139 |
| 32               | 1                | 0              | -1.272569               | -0.287130 | -1.472411 |
| 33               | 1                | 0              | -2.362280               | 2.443108  | -2.049011 |
| 34               | 1                | 0              | -0.317775               | 4.857109  | 4.065123  |
| 35               | 1                | 0              | 1.293424                | 4.926147  | 4.519114  |
| 36               | 6                | 0              | 0.671926                | 4.609486  | 3.681462  |
| 37               | 1                | 0              | 0.946307                | 5.103434  | 2.749385  |
| 38               | 6                | 0              | 2.948655                | -0.909556 | 1.016624  |
| 39               | 8                | 0              | 3.362945                | -1.110627 | 2.181187  |
| 40               | 1                | 0              | 3.028996                | -1.558892 | -0.954679 |
| 41               | 1                | 0              | 2.803410                | -4.277848 | -0.456092 |
| 42               | 6                | 0              | -3.833780               | -0.713582 | -0.465754 |
| 43               | 8                | 0              | -3.118548               | -1.587649 | 0.017803  |
| 44               | 1                | 0              | -2.047870               | 1.272517  | -3.306852 |
| 45               | 6                | 0              | -5.307166               | -0.837712 | -0.401073 |
| 46               | 1                | 0              | -5.636567               | -0.576525 | -1.406768 |
| 47               | 6                | 0              | 2.091868                | 3.604381  | -3.049570 |
| 48               | 6                | 0              | 0.931287                | 4.380828  | -2.763143 |
| 49               | 6                | 0              | -0.248957               | 3.698294  | -2.469054 |
| 50               | 6                | 0              | -0.324740               | 2.280343  | -2.582881 |

|    |   |   |           |           |           |
|----|---|---|-----------|-----------|-----------|
| 51 | 6 | 0 | 0.780111  | 1.602650  | -3.058242 |
| 52 | 6 | 0 | 1.927472  | 2.245627  | -3.379192 |
| 53 | 1 | 0 | 2.983124  | 4.139399  | -3.342788 |
| 54 | 1 | 0 | 0.962695  | 5.459215  | -2.812956 |
| 55 | 1 | 0 | -1.133502 | 4.202671  | -2.108949 |
| 56 | 1 | 0 | 0.787176  | 0.522680  | -3.047925 |
| 57 | 1 | 0 | 2.868698  | 1.789486  | -3.648128 |
| 58 | 8 | 0 | 6.696341  | -3.124820 | -0.223274 |
| 59 | 6 | 0 | 8.045209  | -2.891829 | -0.651492 |
| 60 | 1 | 0 | 8.339477  | -1.902513 | -1.001886 |
| 61 | 1 | 0 | 8.727294  | -3.302026 | 0.093144  |
| 62 | 1 | 0 | 8.140613  | -3.512347 | -1.542517 |
| 63 | 1 | 0 | 3.563260  | -3.560227 | -1.791744 |
| 64 | 1 | 0 | 4.468303  | -4.776237 | -0.895884 |
| 65 | 7 | 0 | -5.505444 | -2.253155 | -0.116363 |
| 66 | 1 | 0 | -4.634178 | -2.697910 | 0.134838  |
| 67 | 6 | 0 | -6.587742 | -2.993837 | -0.281890 |
| 68 | 8 | 0 | -7.639247 | -2.634484 | -0.853490 |
| 69 | 6 | 0 | -6.541453 | -4.447432 | 0.223900  |
| 70 | 1 | 0 | -6.620318 | -5.116952 | -0.632591 |
| 71 | 1 | 0 | -5.627464 | -4.720662 | 0.751408  |
| 72 | 1 | 0 | -7.387146 | -4.673384 | 0.873429  |
| 73 | 6 | 0 | -6.083095 | 0.007224  | 0.639544  |
| 74 | 1 | 0 | -5.861579 | 0.994493  | 0.233914  |
| 75 | 1 | 0 | -7.169633 | -0.048779 | 0.573589  |
| 76 | 1 | 0 | -5.756503 | -0.285244 | 1.637438  |

### 8-unfold : M06-2x/6-31G(d), scrf=(smd, solvent=DMSO)

NIMG=1 (12.5072 cm<sup>-1</sup>)

|                                              |                             |
|----------------------------------------------|-----------------------------|
| Zero-point correction=                       | 0.648659 (Hartree/Particle) |
| Thermal correction to Energy=                | 0.687658                    |
| Thermal correction to Enthalpy=              | 0.688602                    |
| Thermal correction to Gibbs Free Energy=     | 0.572214                    |
| Sum of electronic and zero-point Energies=   | -1796.053135                |
| Sum of electronic and thermal Energies=      | -1796.014136                |
| Sum of electronic and thermal Enthalpies=    | -1796.013192                |
| Sum of electronic and thermal Free Energies= | -1796.129580                |

Standard orientation:

| Center<br>Number | Atomic<br>Number | Atomic<br>Type | Coordinates (Angstroms) |           |           |
|------------------|------------------|----------------|-------------------------|-----------|-----------|
|                  |                  |                | X                       | Y         | Z         |
| 1                | 7                | 0              | 4.756197                | -1.188996 | -0.720354 |
| 2                | 6                | 0              | 6.004182                | -1.811467 | -0.459375 |
| 3                | 6                | 0              | 7.003751                | -0.932134 | 0.360967  |
| 4                | 8                | 0              | 6.846143                | 0.285836  | 0.484290  |
| 5                | 6                | 0              | 6.611353                | -2.409131 | -1.732478 |
| 6                | 1                | 0              | 5.843676                | -2.641405 | 0.228780  |
| 7                | 6                | 0              | 1.387762                | 0.707343  | 1.647853  |
| 8                | 6                | 0              | 1.187828                | -0.190099 | 0.405257  |
| 9                | 6                | 0              | 1.529497                | 1.939161  | -0.474107 |
| 10               | 6                | 0              | 1.731387                | 2.119122  | 1.069815  |
| 11               | 1                | 0              | 0.584525                | 0.545839  | 2.366788  |
| 12               | 1                | 0              | 0.630328                | -1.115535 | 0.549730  |
| 13               | 1                | 0              | 0.932401                | 2.785547  | 1.394611  |
| 14               | 1                | 0              | 2.707049                | 2.401668  | 1.465382  |
| 15               | 6                | 0              | 2.687811                | 1.042267  | -0.981801 |
| 16               | 1                | 0              | 3.557677                | 1.470056  | -0.483273 |

|    |   |   |           |           |           |
|----|---|---|-----------|-----------|-----------|
| 17 | 1 | 0 | 2.701522  | 1.176121  | -2.063449 |
| 18 | 6 | 0 | 2.383042  | -0.393987 | -0.537920 |
| 19 | 1 | 0 | 2.014140  | -0.921367 | -1.417612 |
| 20 | 7 | 0 | 0.517485  | 0.889407  | -0.383186 |
| 21 | 6 | 0 | 1.321859  | 3.273104  | -1.178840 |
| 22 | 1 | 0 | 0.877327  | 3.225881  | -2.172987 |
| 23 | 1 | 0 | 0.492494  | 3.780282  | -0.686003 |
| 24 | 8 | 0 | 2.574622  | 4.004858  | -1.086814 |
| 25 | 1 | 0 | 2.193644  | 0.361004  | 2.294906  |
| 26 | 7 | 0 | -3.022903 | 0.576233  | 0.087028  |
| 27 | 6 | 0 | -1.827320 | -0.104765 | -0.331494 |
| 28 | 6 | 0 | -0.820368 | 0.977083  | -0.713726 |
| 29 | 8 | 0 | -1.279563 | 1.920881  | -1.379200 |
| 30 | 6 | 0 | -2.225797 | -1.087796 | -1.503159 |
| 31 | 1 | 0 | -3.591531 | 0.896436  | -0.683855 |
| 32 | 1 | 0 | -1.343470 | -0.712337 | 0.433255  |
| 33 | 1 | 0 | -1.379990 | -1.693445 | -1.828588 |
| 34 | 1 | 0 | 3.363019  | 5.843141  | -1.374934 |
| 35 | 1 | 0 | 2.481473  | 5.069881  | -2.660954 |
| 36 | 6 | 0 | 2.444992  | 5.298599  | -1.595893 |
| 37 | 1 | 0 | 1.502820  | 5.823032  | -1.436342 |
| 38 | 6 | 0 | 3.639221  | -1.192792 | 0.038388  |
| 39 | 8 | 0 | 3.590887  | -1.730000 | 1.182365  |
| 40 | 1 | 0 | 4.634296  | -0.817998 | -1.651793 |
| 41 | 1 | 0 | 6.846083  | -1.529605 | -2.332011 |
| 42 | 6 | 0 | -3.338179 | 0.772081  | 1.335535  |
| 43 | 8 | 0 | -2.558046 | 0.551397  | 2.294834  |
| 44 | 1 | 0 | -2.540181 | -0.576183 | -2.412834 |
| 45 | 6 | 0 | -4.710587 | 1.401514  | 1.593041  |
| 46 | 1 | 0 | -4.710426 | 2.349204  | 1.054510  |
| 47 | 6 | 0 | -5.021927 | -4.208368 | -0.417330 |
| 48 | 6 | 0 | -5.479377 | -3.000121 | -0.937246 |
| 49 | 6 | 0 | -4.640753 | -1.966974 | -1.291811 |
| 50 | 6 | 0 | -3.252550 | -2.104081 | -1.024715 |
| 51 | 6 | 0 | -2.897507 | -3.273942 | -0.340920 |
| 52 | 6 | 0 | -3.740796 | -4.280432 | -0.043588 |
| 53 | 1 | 0 | -5.686704 | -5.051898 | -0.303061 |
| 54 | 1 | 0 | -6.517639 | -2.890204 | -1.213644 |
| 55 | 1 | 0 | -4.975887 | -1.091680 | -1.828569 |
| 56 | 1 | 0 | -1.837924 | -3.340270 | -0.142903 |
| 57 | 1 | 0 | -3.363900 | -5.170256 | 0.438577  |
| 58 | 8 | 0 | 7.929932  | -1.711684 | 1.030394  |
| 59 | 6 | 0 | 8.590235  | -1.126099 | 2.060890  |
| 60 | 1 | 0 | 8.806466  | -1.890268 | 2.807515  |
| 61 | 1 | 0 | 9.545343  | -0.637847 | 1.867362  |
| 62 | 1 | 0 | 8.021519  | -0.398240 | 2.639766  |
| 63 | 1 | 0 | 7.573352  | -2.907571 | -1.613495 |
| 64 | 1 | 0 | 5.967238  | -3.159154 | -2.191472 |
| 65 | 7 | 0 | -5.860895 | 0.623853  | 1.167839  |
| 66 | 1 | 0 | -6.349152 | 0.107669  | 1.885563  |
| 67 | 6 | 0 | -6.447335 | 0.718926  | -0.055776 |
| 68 | 8 | 0 | -5.949941 | 1.428246  | -0.926941 |
| 69 | 6 | 0 | -7.747033 | 0.005753  | -0.293786 |
| 70 | 1 | 0 | -8.601118 | 0.586336  | 0.054956  |
| 71 | 1 | 0 | -7.853107 | -0.264625 | -1.344360 |
| 72 | 1 | 0 | -7.795246 | -0.965052 | 0.199554  |
| 73 | 6 | 0 | -4.980067 | 1.760203  | 3.056458  |
| 74 | 1 | 0 | -4.116291 | 2.262321  | 3.492151  |
| 75 | 1 | 0 | -5.881103 | 2.344481  | 3.243405  |
| 76 | 1 | 0 | -5.054131 | 0.848485  | 3.649184  |

## 8. Reference

- (1) L. Zhai, Y. Otani, Y. Hori, T. Tomita and T. Ohwada, *Chem. Commun.* , 2020, **56**, 1573–1576.
- (2) M. Nara, H. Morii and M. Tanokura, Springer Nature, 2019, 127-134.
- (3) E. van Lenthe and E. Baerends, *J Comput Chem*, 2003, **24**, 1142–1156.
